# Supplementary material for: Novel ((3Z,5Z)-3,5-bis(phenylimino)-1,2-dithiolan-4-yl) and 3H-[1,2]dithiolo[3,4-b]quinolin-4(9H)-one heterocycles: an effective and facile green route
Source: Royal Society of Chemistry journal article supplement (doi:10.1039/b808949c), 2008-11-19
Supplement: b808949c.pdf [file b808949c.pdf]

**Novel ((3Z,5Z)-3,5-bis(phenylimino)-1,2-dithiolan-4-yl) and 3H-[1,2]dithiolo  
[3,4-b]quinolin-4(9H)-one heterocycles: an effective and facile green route**

Fang Fang Jian,\* Jian Zheng, Yu Feng Li, Jing Wang

<sup>a</sup> *Microscale Science Institute, Weifang University, Weifang 261061, P. R. China*

<sup>b</sup> *New Materials & Function Coordination Chemistry Laboratory, Qingdao University of  
Science and Technology, Qingdao, 266042, China.*

[ffj2003@163169.net](mailto:ffj2003@163169.net)

## Supporting information

| <b>Table of contents</b>                                                   | <b>Page</b>        |
|----------------------------------------------------------------------------|--------------------|
| <b>1. General</b>                                                          | <b>S-1</b>         |
| <b>2. Study on the effects of reaction condition for compounds 1</b>       | <b>S-1 ~ S-3</b>   |
| <b>3. Study on the effects of reaction condition for compounds 2</b>       | <b>S-3 ~ S-4</b>   |
| <b>4. The comparing result for solvent-free method and general method.</b> | <b>S-5</b>         |
| <b>5. Spectra data</b>                                                     | <b>S-6 ~ S-29</b>  |
| <b>6. Crystallographic data for the compounds 1e</b>                       | <b>S-30 ~ S-31</b> |
| <b>7. Crystallographic data for the compounds 1h</b>                       | <b>S-31 ~ S-32</b> |
| <b>8. Crystallographic data for the compounds 1i</b>                       | <b>S-33~ S-34</b>  |
| <b>9. Crystallographic data for the compounds 2e</b>                       | <b>S-34~ S-35</b>  |
| <b>10. Drug Screening report</b>                                           | <b>S-36~ S-37</b>  |

**S-0**

## 1. General

The NMR spectra were recorded on 400M NMR spectrometer. In all cases  $\text{CDCl}_3$  was used as solvent. Chemical Shifts are reported in *ppm* from tetramethylsilane with the solvent resonance as the internal standard (deuteriochloroform:  $\delta 7.27$  ppm). Data are reported as follows: chemical shifts, multiplicity (s = singlet, d = doublet, t = triplet, q = quartet, br = broad, m = multiplet), coupling constants (Hz). The C and H elemental analyses were performed on a Perkin-Elmer elemental analyzer. Infrared spectra were recorded using pressed KBr plates in the 4000-400  $\text{cm}^{-1}$  ranges. Crystals data were collected on four circle diffractometer with graphite monochromated Mo  $K_\alpha$  radiation ( $\lambda = 0.71073\text{\AA}$ ). Intensities were corrected for Lorentz and polarization effects and empirical absorption, and the data reduction was carried out using SADABS program. The structure was solved by direct methods using SHELXS-97. All the non-hydrogen atoms were refined on  $F^2$  anisotropically by full-matrix least squares method. The hydrogen atom positions were fixed geometrically at calculated distances and allowed to ride on the parent carbon atoms.

1-isothio-cyanatobenzene, a variety of 1-(substituted-phenyl)ethanone derivatives, organic solvent and other chemical reagents were obtained from commercial sources and used without further purification. The effects of reaction conditions introduced here were general method, not solvent-free synthesis route (**2** and **3**).

## 2. Study on the effects of reaction condition for ((3Z,5Z)-3,5-bis(phenylimino)-1,2-dithiolan-4-yl) derivatives **1**

**2-1 General Synthesis Process:** To a 50 mL flask 0.01 mol of 1-(substituted-phenyl) ethanone derivatives in 20 mL of dioxane, 0.02 mol (1.12 g) of KOH was added with stirring at room temperature, then dropwise added 0.02 mol 1-isothio-cyanatobenzene dioxane solvent in three hours. The reaction was maintained six hours until the yellow precipitation was formed. The precipitation was filtered, washed with diethyl ether, dried in the air. The yellow single crystals suitable for X-ray measurements were obtained by recrystallized from mixture solvent (acetic ether : cyclohexane = 1 : 3). Compounds (**1**) are stable in the solid state and in any organic solvent. Compounds **1a** ~ **1j** were characterized by element analysis, IR, and  $^1\text{H}$  NMR spectroscopy, and **1e**, **1h** and **1i** were also characterized by X-ray diffraction.

## 2-2 The effects of solvents.

**Table S1 The effects of solvent to the reaction**

| Solvent         | Yield (%) | Solvent         | Yield (%) |
|-----------------|-----------|-----------------|-----------|
| 1,4-dioxane     | 91.5      | cyclohexane     | 40.0      |
| tetrahydrofuran | 71.0      | petroleum ether | 25.9      |
| ethyl ether     | 65.5      | pyridine        | 45.8      |
| ethanol         | 0         | benzene         | 42.4      |
| methanol        | 0         | toluene         | 40.7      |
| water           | 0         | n-hexane        | 35.5      |
| DMF             | 12.7      | ethyl acetate   | 0         |

## 2-3 The effects of the Base.

**Table S2 The effects of base to the reaction**

| entry | base                            | solvent | Tem. (°) | Time (h) | Yield% |
|-------|---------------------------------|---------|----------|----------|--------|
| 1     | KOH                             | Dioxane | r.t.     | 6        | 91.5   |
| 2     | K <sub>2</sub> CO <sub>3</sub>  | Dioxane | r.t.     | 6        | 0      |
| 3     | Na <sub>2</sub> CO <sub>3</sub> | Dioxane | r.t.     | 6        | 0      |
| 4     | NaOH                            | Dioxane | r.t.     | 6        | 64.5   |
| 5     | Na                              | Dioxane | r.t.     | 6        | 71.0   |
| 6     | NaOEt                           | Dioxane | r.t.     | 5        | 0      |
| 7     | N(Et) <sub>3</sub>              | Dioxane | r.t.     | 6        | 0      |

## 2-4 The effects of the temperature.

**Table S3 The effect of temperature to the reaction**

| entry | base | solvent | Tem. (°) | Time (h) | Yield% |
|-------|------|---------|----------|----------|--------|
| 1     | KOH  | Dioxane | -10      | 6        | 81.4   |
| 2     | KOH  | Dioxane | 0        | 6        | 85.7   |
| 3     | KOH  | Dioxane | 25       | 6        | 91.5   |
| 4     | KOH  | Dioxane | 40.      | 6        | 86.3   |
| 5     | KOH  | Dioxane | 70.      | 6        | 77.4   |
| 6     | KOH  | Dioxane | 100      | 5        | 56.9   |

## 2-5 The Element Analysis found for compounds (1)

**Table S4 Element Analysis: Found (Calad) of compounds 1a-1j**

| Comp.      | Formula                                                                         | W      | C/%          | H/%         | N/%          | S/%           |
|------------|---------------------------------------------------------------------------------|--------|--------------|-------------|--------------|---------------|
| <b>1 a</b> | C <sub>22</sub> H <sub>15</sub> ClN <sub>2</sub> OS <sub>2</sub>                | 422.95 | 62.406(2.48) | 3.55 (3.57) | 6.59(6.62)   | 15.16(15.13)  |
| <b>1 b</b> | C <sub>22</sub> H <sub>15</sub> ClN <sub>2</sub> OS <sub>2</sub>                | 422.95 | 62.55(62.55) | 3.45 (3.58) | 6.59(6.64)   | 15.19(15.13)  |
| <b>1c</b>  | C <sub>22</sub> H <sub>15</sub> BrN <sub>2</sub> OS <sub>2</sub>                | 467.40 | 56.44(56.65) | 3.21 (3.24) | 6.22(6.01)   | 13.65 (13.69) |
| <b>1d</b>  | C <sub>22</sub> H <sub>15</sub> FN <sub>2</sub> OS <sub>2</sub>                 | 406.49 | 65.15(65.01) | 3.70 (3.72) | 6.88(6.90)   | 15.72 (15.74) |
| <b>1e</b>  | C <sub>22</sub> H <sub>14</sub> Cl <sub>2</sub> N <sub>2</sub> OS <sub>2</sub>  | 457.39 | 57.80(57.90) | 3.00 (3.09) | 6.14(6.12)   | 13.89 (13.99) |
| <b>1f</b>  | C <sub>22</sub> H <sub>14</sub> Cl <sub>2</sub> N <sub>2</sub> OS <sub>2</sub>  | 457.39 | 57.80(57.90) | 3.00 (3.09) | 6.15(6.12)   | 13.89 (13.99) |
| <b>1g</b>  | C <sub>22</sub> H <sub>14</sub> Cl <sub>2</sub> N <sub>2</sub> OS <sub>2</sub>  | 457.39 | 57.81(57.90) | 2.99 (3.09) | 6.15(6.12)   | 13.89 (13.99) |
| <b>1h</b>  | C <sub>22</sub> H <sub>13</sub> Cl <sub>2</sub> FN <sub>2</sub> OS <sub>2</sub> | 475.38 | 55.65(55.70) | 2.66 (2.76) | 5.96(5.91)   | 13.40 (13.46) |
| <b>1i</b>  | C <sub>23</sub> H <sub>17</sub> BrN <sub>2</sub> OS <sub>2</sub>                | 481.42 | 57.60(57.50) | 3.55 (3.57) | 5.94(5.83)   | 13.20 (13.29) |
| <b>1j</b>  | C <sub>21</sub> H <sub>15</sub> N <sub>3</sub> OS <sub>2</sub>                  | 389.45 | 64.66(64.77) | 3.88 (3.89) | 10.88(10.80) | 16.40 (16.43) |

## 3. Study on the effects of reaction condition for 3H-[1,2]dithiolo[3,4-*b*]quinolin-4(9H)-one 2

**3-1 General Synthesis Process:** As an example, the synthesis of (3*Z*)-7-chloro-9-phenyl-3-(phenylimino)-3H-[1,2]dithiolo [3,4-*b*]quinolin-4(9H)-one **2e** is given to illustrate the general procedure. To a 50 mL flask 0.01 mol of 1-(2,4-dichlorophenyl) ethanone in 20 mL of anhydrous dioxane, 0.04 mol (1.75 g) KOH and a little metal K was added with stirring, refluxing for 10 mins, then dropwise added 0.02 mol 1-isothio cyanatobenzene in three hours. The reaction was maintained six hours until the yellow precipitation was formed. The precipitation was filtered, washed with diethyl ether, dissolved in the water, added extra Ce(NO<sub>3</sub>)<sub>3</sub> aquo with stirring. The yellow precipitation was formed, isolated by filtration. The yellow single crystals suitable for X-ray measurements were obtained by recrystallized from mixture solvent (acetic ether :

petroleum ether = 1 : 2). We have gotten five 3H-[1,2]dithiolo[3,4-*b*]quinolin-4(9H)-one. Five compounds **2a**, **2e**, **2f**, **2h** and **2i** were characterized by element analysis (See Table S7), IR, and <sup>1</sup>H NMR spectroscopy, and **2e** were also characterized by X-ray diffraction.

### 3-2 The effects of solvent

**Table S5 the effects of solvent to the reaction**

| solvent         | Yield (%) | solvent         | Yield (%) |
|-----------------|-----------|-----------------|-----------|
| 1,4-dioxine     | 50.0      | cyclohexane     | 13.1      |
| tetrahydrofuran | 41.2      | petroleum ether | 11.1      |
| ethyl ether     | 35.6      | pyridine        | 34.1      |
| n-hexane        | 12.1      | benzene         | 17.2      |
| DMF             | 10.7      | toluene         | 14.3      |

### 3-3 The effects of the catalyst

**Table S6 the effects of catalyst to the reaction**

| catalyzer                         | Yield (%) | catalyst                          | Yield (%) |
|-----------------------------------|-----------|-----------------------------------|-----------|
| Ce(NO <sub>3</sub> ) <sub>3</sub> | 63.0      | CuCl <sub>2</sub>                 | 0         |
| Ce(NO <sub>3</sub> ) <sub>4</sub> | 0         | FeCl <sub>3</sub>                 | 15        |
| CeCl <sub>3</sub>                 | 59.0      | H <sub>2</sub> O <sub>2</sub>     | 0         |
| GdCl <sub>3</sub>                 | 56.3      | Pb(NO <sub>3</sub> ) <sub>4</sub> | 0         |
| NaNO <sub>3</sub>                 | 4.6       | air                               | 4.3       |

### 3-4 The Element Analysis found for compound (2)

**Table S7 Element Analysis: Found (Calad) of compounds 2a~2e**

| Comp | Formula                                                           | W      | C/%           | H/%         | N/%         | S/%          |
|------|-------------------------------------------------------------------|--------|---------------|-------------|-------------|--------------|
| 2a   | C <sub>22</sub> H <sub>14</sub> N <sub>2</sub> OS <sub>2</sub>    | 386.49 | 68.31(68.37)  | 3.70 (3.65) | 7.30 (7.25) | 16.50(16.55) |
| 2e   | C <sub>22</sub> H <sub>13</sub> ClN <sub>2</sub> OS <sub>2</sub>  | 420.93 | 62.75 (62.78) | 3.10 (3.11) | 6.68 (6.66) | 15.23(15.20) |
| 2f   | C <sub>22</sub> H <sub>13</sub> ClN <sub>2</sub> OS <sub>2</sub>  | 420.93 | 62.67 (62.78) | 3.10 (3.11) | 6.68 (6.66) | 15.25(15.20) |
| 2h   | C <sub>22</sub> FH <sub>12</sub> ClN <sub>2</sub> OS <sub>2</sub> | 438.92 | 60.05 (60.20) | 2.66 (2.76) | 6.40 (6.38) | 14.56(14.58) |
| 2i   | C <sub>23</sub> H <sub>16</sub> N <sub>2</sub> OS <sub>2</sub>    | 400.51 | 68.80 (68.97) | 3.99 (4.03) | 7.02 (6.99) | 15.96(15.97) |

#### 4. The comparing result for solvent-free method and general method.

**Table S8** The comparing result.

| Entry     | Condition    | solvent | Temp. (°C) | React. Time | Yield% |
|-----------|--------------|---------|------------|-------------|--------|
| <b>1a</b> | General      | Dioxane | Room Temp. | 6 hour      | 73.0   |
|           | Solvent-free | No      | Room Temp. | 10 minutes  | 96.0   |
| <b>1b</b> | General      | Dioxane | Room Temp. | 6 hour      | 91.5   |
|           | Solvent-free | No      | Room Temp. | 10 minutes  | 88.0   |
| <b>1e</b> | General      | Dioxane | Room Temp. | 6 hour      | 73.5   |
|           | Solvent-free | No      | Room Temp. | 15 minutes  | 68.0   |
| <b>1f</b> | General      | Dioxane | Room Temp. | 6 hour      | 75.0   |
|           | Solvent-free | No      | Room Temp. | 15 minutes  | 65.0   |
| <b>1j</b> | General      | Dioxane | Room Temp. | 6 hour      | 91.5   |
|           | Solvent-free | No      | Room Temp. | 15 minutes  | 86.0   |

## 5. Spectra data

### 5-1 Spectra data for ((3Z,5Z)-3,5-bis(phenylimino)-1,2-dithiolan-4-yl) derivatives 1

1a:

#### (2-chlorophenyl)((3Z)-5-(phenylamino)-3-(phenylimino)-3H-1,2-dithiol-4-yl)methanone

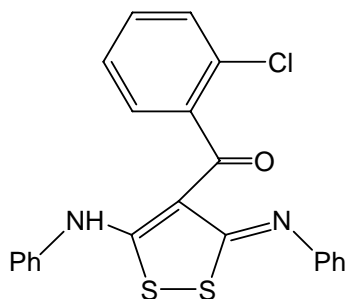

Yield: 73%. mp 170-172 °C;  $^1\text{H}$  NMR (400Hz,  $\text{CDCl}_3$ ):  $\delta$ 12.814(s, 1H N-H); 7.751-6.783(m, 15H -C=C-H); IR ( $\nu_{\text{max}}$ ,  $\text{cm}^{-1}$ ): 3446w, N-H); 1637s, -C=O); 1583(s, -C=N-); 1544 (s, N-H); 1191 (m, S-C).EA (Anal. Calc. (%) for  $\text{C}_{22}\text{H}_{15}\text{ClN}_2\text{OS}_2$ ): C 62.48 H 3.57 N 6.62 S 15.13; Found (%): C 62.406, H 3.55, N 6.59 S 15.16.

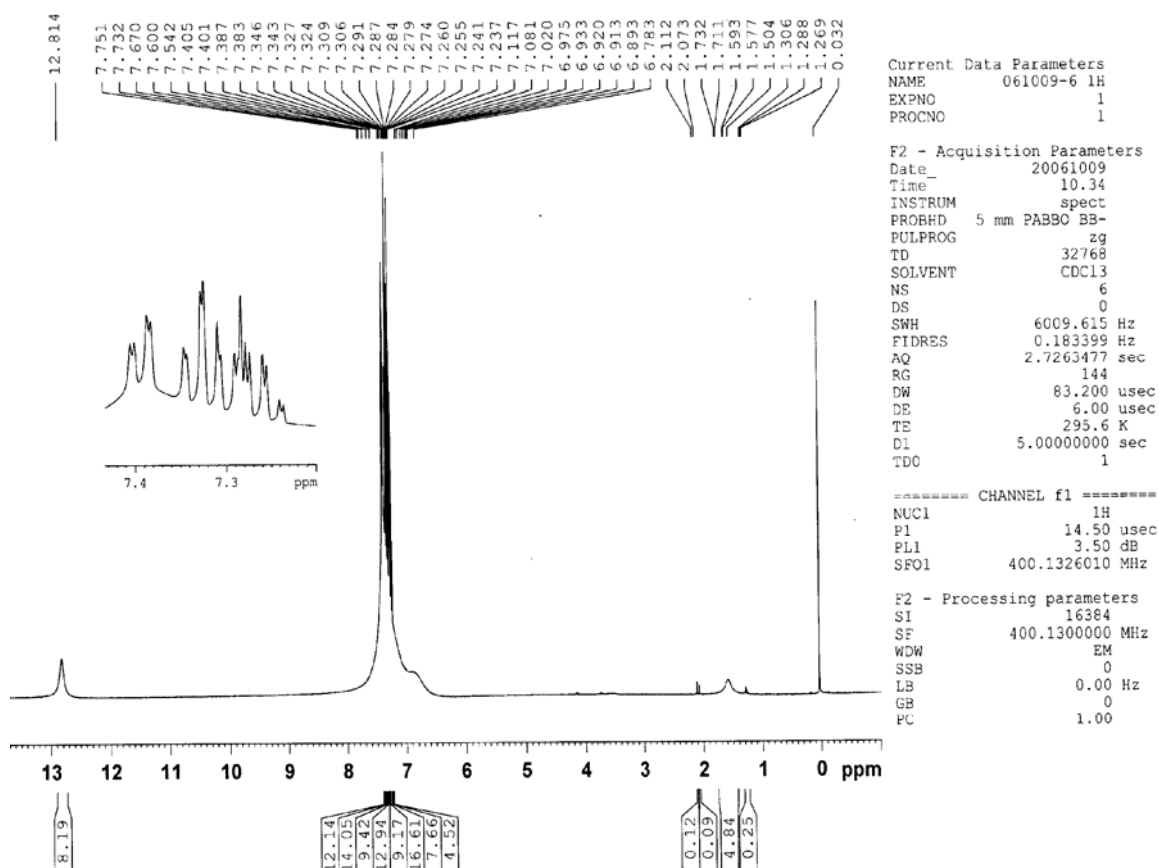

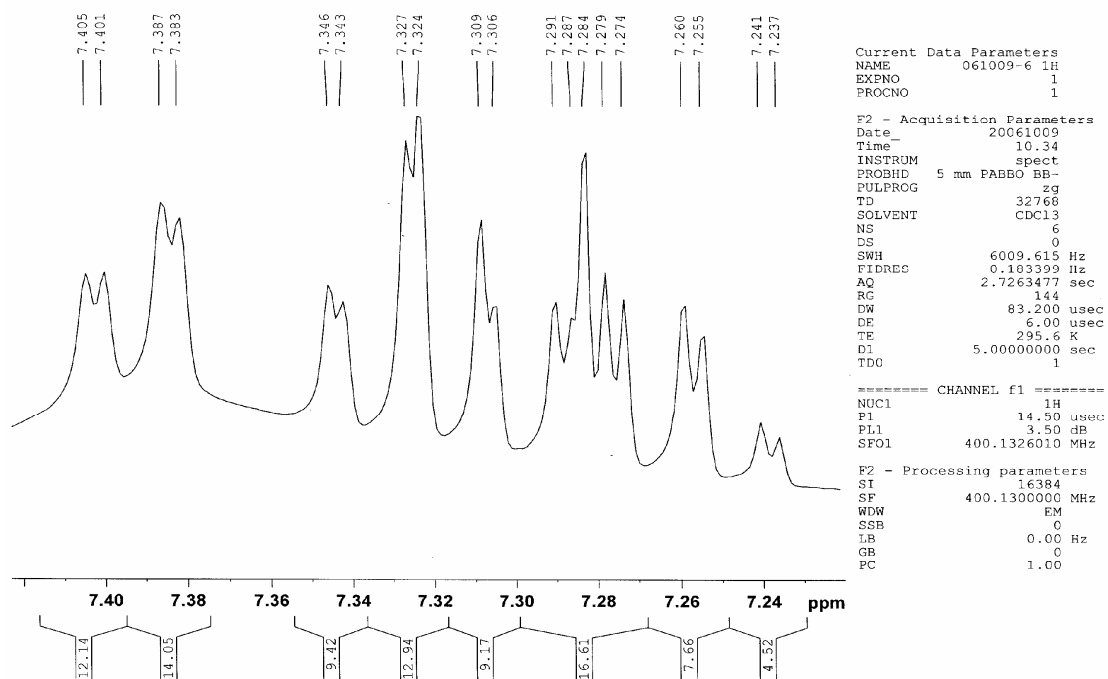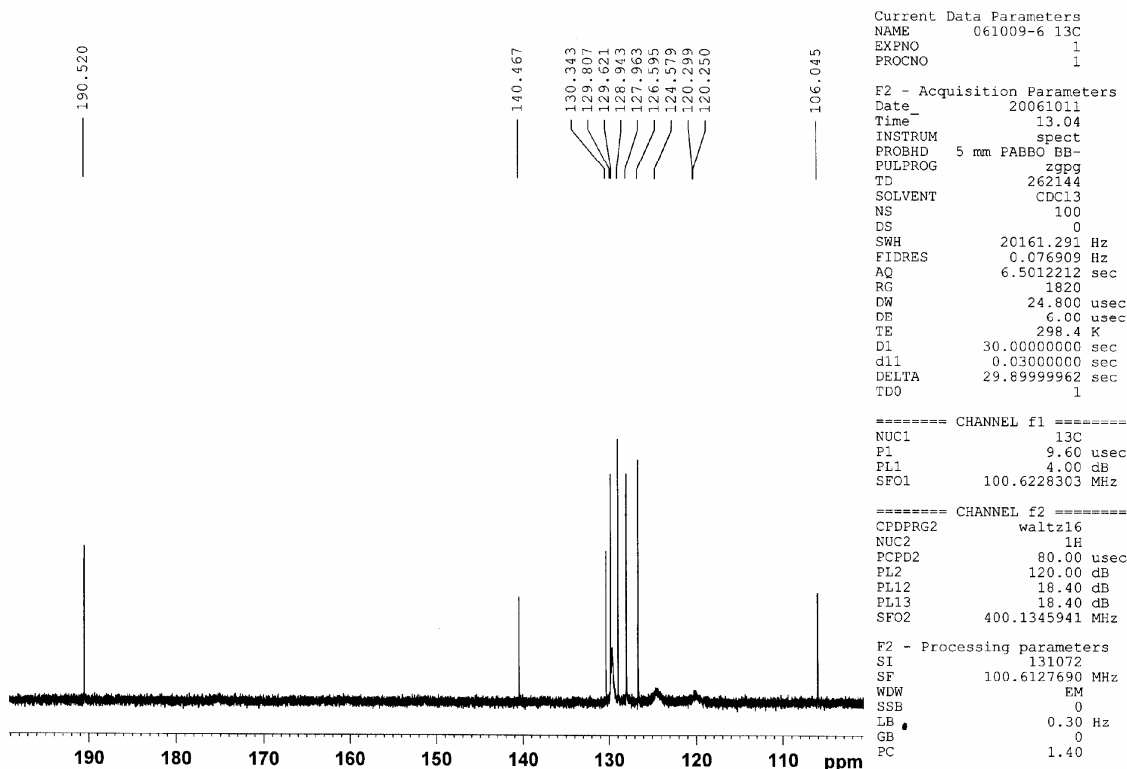

S-7



**1b:**

**(4-chlorophenyl)((3Z)-5-(phenylamino)-3-(phenylimino)-3H-1,2-dithiol-4-yl)methanone**

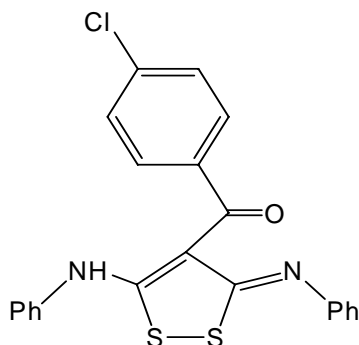

Yield: 91.5%. mp 148-150 °C; <sup>1</sup>H NMR (400Hz, CDCl<sub>3</sub>): δ10.794(s, 1H N-H); 8.257-6.223(m, 15H -C=C-H); IR (ν<sub>max</sub>, cm<sup>-1</sup>): 3443 (w, N-H); 1608 (s, -C=O); 1591(s, -C=N-); 1517 (s, N-H); 1212(m, S-C). EA (Anal. Calc. (%) for C<sub>22</sub>H<sub>15</sub>ClN<sub>2</sub>O<sub>2</sub>S<sub>2</sub>):C 62.55 H 3.58 N 6.64 S 15.13; Found (%):C 62.55, H 3.45, N 6.59 S 15.19.

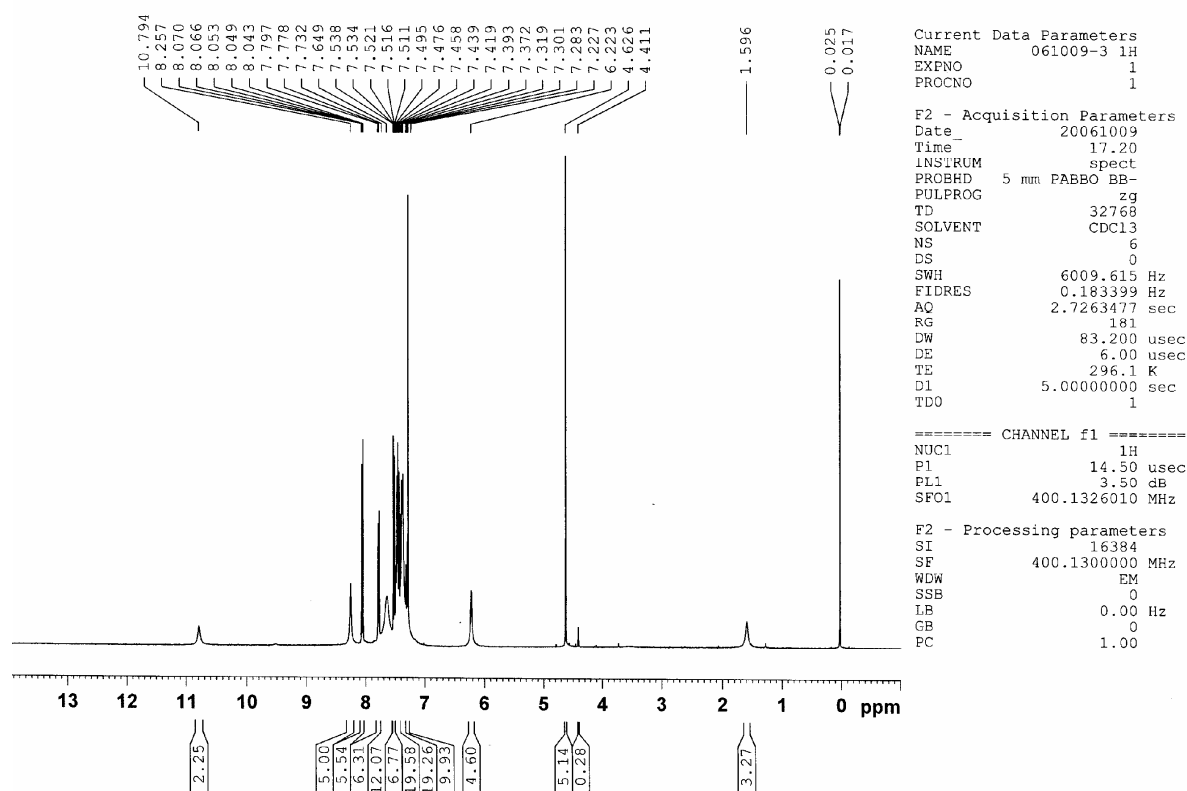

**S-8**

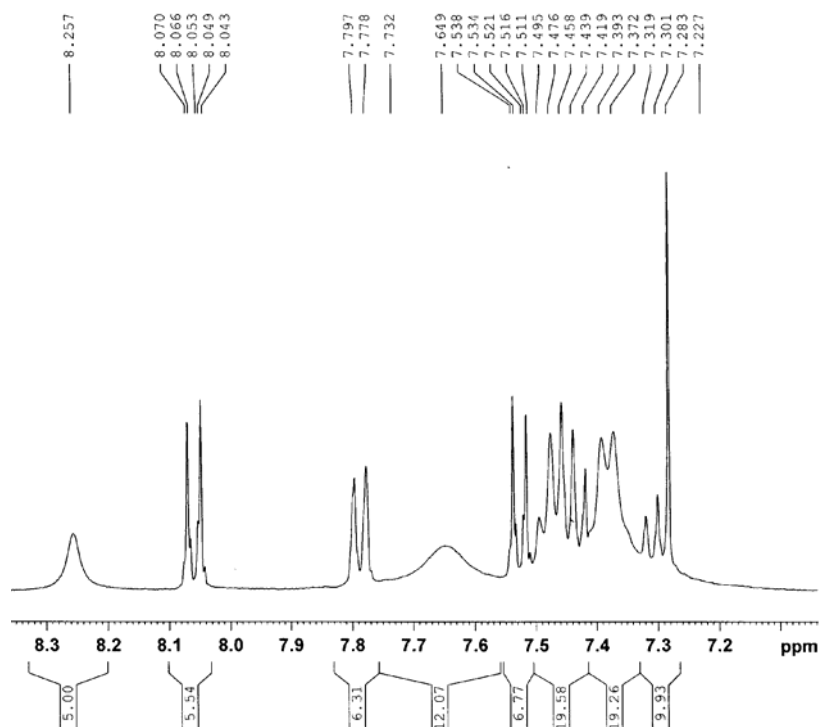

```

Current Data Parameters
NAME      061009-3 1H
EXPNO    1
PROCNO   1

F2 - Acquisition Parameters
Date_    20061009
Time     17.20
INSTRUM spect
PROBHD   5 mm PABBO BB-
PULPROG zg
TD       32768
SOLVENT  CDCl3
NS       6
DS       0
SWH      6009.615 Hz
FIDRES   0.183399 Hz
AQ       2.7263477 sec
RG       181
DW       83.200 usec
DE       6.00 usec
TE       296.1 K
D1       5.00000000 sec
TDO      1

===== CHANNEL f1 =====
NUC1     1H
P1       14.50 usec
PL1      3.50 dB
SFO1     400.1326010 MHz

F2 - Processing parameters
SI       16384
SF       400.1300000 MHz
WDW      EM
SSB      0
LB       0.00 Hz
GB       0
PC       1.00
    
```

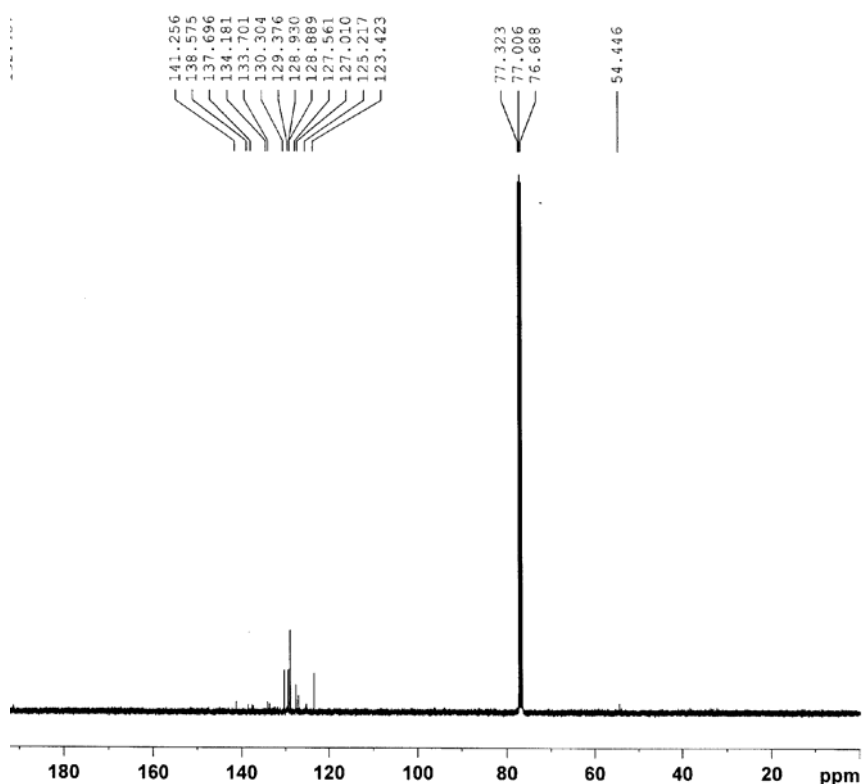

```

Current Data Parameters
NAME      061009-3 13C
EXPNO    1
PROCNO   1

F2 - Acquisition Parameters
Date_    20061009
Time     19.03
INSTRUM spect
PROBHD   5 mm PABBO BB-
PULPROG zgpg
TD       262144
SOLVENT  CDCl3
NS       150
DS       0
SWH      20161.291 Hz
FIDRES   0.076909 Hz
AQ       6.5012212 sec
RG       912
DW       24.600 usec
DE       6.00 usec
TE       298.4 K
D1       30.00000000 sec
d11      0.03000000 sec
DELTA    29.89999962 sec
TDO      1

===== CHANNEL f1 =====
NUC1     13C
P1       9.60 usec
PL1      4.00 dB
SFO1     100.6228303 MHz

===== CHANNEL f2 =====
CPDPRG2 waltz16
NUC2     1H
PCPD2    80.00 usec
PL2      120.00 dB
PL12     18.40 dB
PL13     18.40 dB
SFO2     400.1345941 MHz

F2 - Processing parameters
SI       131072
SF       100.6127690 MHz
WDW      EM
SSB      0
LB       0.30 Hz
GB       0
PC       1.40
    
```

**1c:**

**(4-bromophenyl)((3Z)-5-(phenylamino)-3-(phenylimino)-3H-1,2-dithiol-4-yl)methanone**

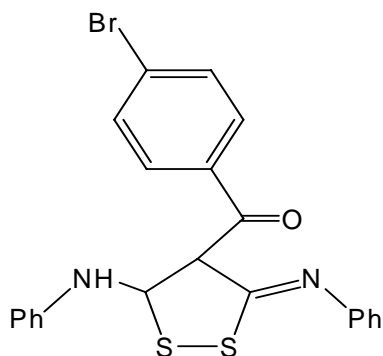

Yield: 93%. mp 154-156°C; <sup>1</sup>H NMR (400Hz, CDCl<sub>3</sub>): δ10.781(s, 1H N-H); 8.217-6.223(m, 15H -C=C-H).IR( $\nu_{\max}$ , cm<sup>-1</sup>): 3441(w, N-H); 1608(s, -C=O); 1590(s, -C=N-); 1515 (s, N-H); 1212(m, S-C). EA (Anal. Calc. (%) for C<sub>22</sub>H<sub>15</sub>BrN<sub>2</sub>O<sub>2</sub>S<sub>2</sub>):C 56.65 H 3.24 N 6.01 S 13.69; Found (%):C 56.44, H 3.21,N 6.22 S 13.65.

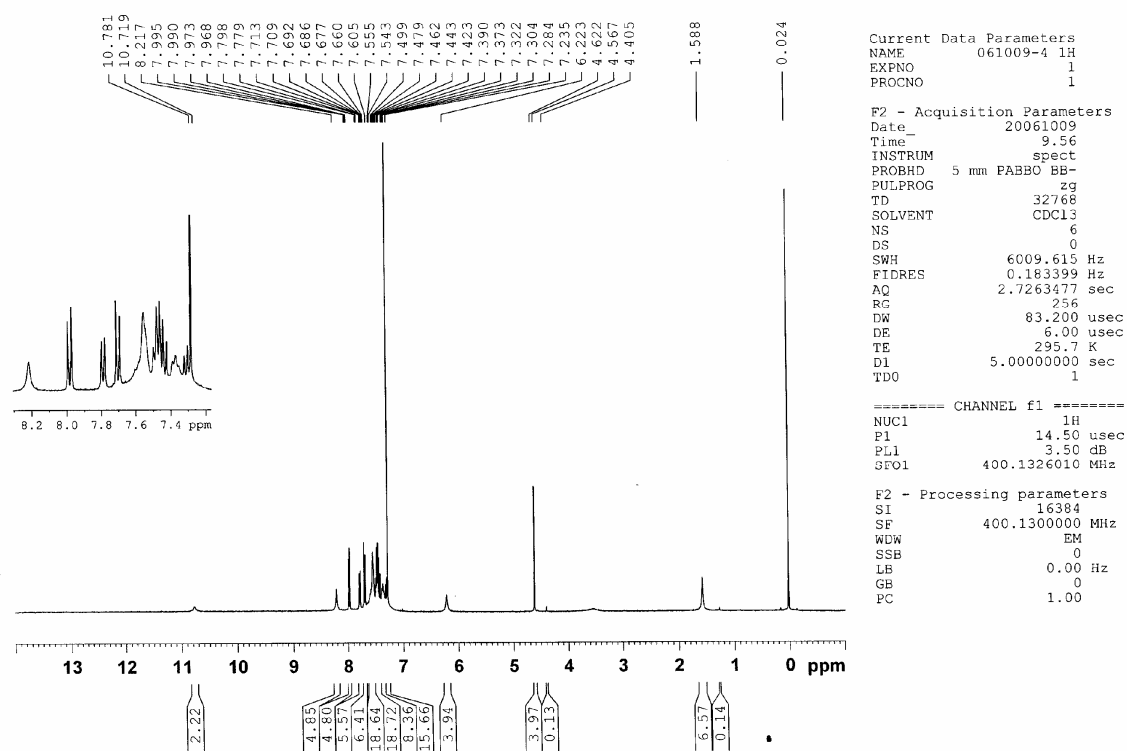

**S-10**

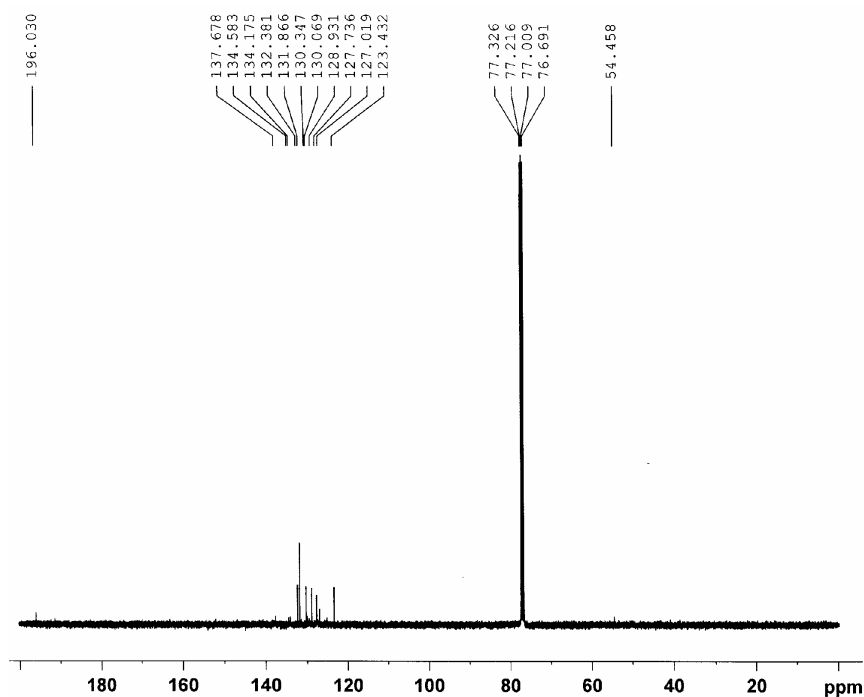

```

Current Data Parameters
NAME      061009-4 13C
EXPNO    1
PROCNO   1

F2 - Acquisition Parameters
Date_    20061011
Time     10.33
INSTRUM  spect
PROBHD   5 mm PABBO BB-
PULPROG  zgpg
TD        262144
SOLVENT  CDCl3
NS        100
DS         0
SWH       20161.291 Hz
FIDRES    0.076909 Hz
AQ        6.5012212 sec
RG         1820
DW         24.800 usec
DE         6.00 usec
TE         298.4 K
D1         30.0000000 sec
d11        0.03000000 sec
DELTA     29.89999962 sec
TDC        1

===== CHANNEL f1 =====
NUC1      13C
P1         9.60 usec
PL1        4.00 dB
SFO1      100.6228303 MHz

===== CHANNEL f2 =====
CPDPRG2   waltz16
NUC2       1H
PCPD2      80.00 usec
PL2        120.00 dB
PL12       18.40 dB
PL13       18.40 dB
SFO2       400.1345941 MHz

F2 - Processing parameters
SI         131072
SF         100.6127690 MHz
WDW        EM
SSB         0
LB          0.30 Hz
GB          0
PC          1.40
    
```

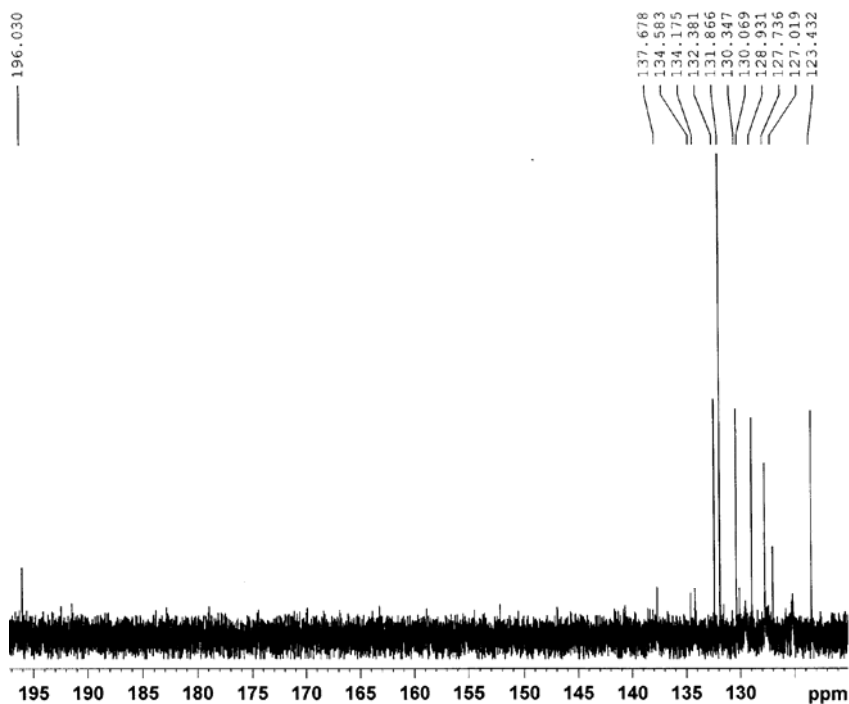

```

Current Data Parameters
NAME      061009-4 13C
EXPNO    1
PROCNO   1

F2 - Acquisition Parameters
Date_    20061011
Time     10.33
INSTRUM  spect
PROBHD   5 mm PABBO BB-
PULPROG  zgpg
TD        262144
SOLVENT  CDCl3
NS        100
DS         0
SWH       20161.291 Hz
FIDRES    0.076909 Hz
AQ        6.5012212 sec
RG         1820
DW         24.800 usec
DE         6.00 usec
TE         298.4 K
D1         30.0000000 sec
d11        0.03000000 sec
DELTA     29.89999962 sec
TDC        1

===== CHANNEL f1 =====
NUC1      13C
P1         9.60 usec
PL1        4.00 dB
SFO1      100.6228303 MHz

===== CHANNEL f2 =====
CPDPRG2   waltz16
NUC2       1H
PCPD2      80.00 usec
PL2        120.00 dB
PL12       18.40 dB
PL13       18.40 dB
SFO2       400.1345941 MHz

F2 - Processing parameters
SI         131072
SF         100.6127690 MHz
WDW        EM
SSB         0
LB          0.30 Hz
GB          0
PC          1.40
    
```

**1d:**

**(4-fluorophenyl)((3Z)-5-(phenylamino)-3-(phenylimino)-3H-1,2-dithiol-4-yl)methanone**

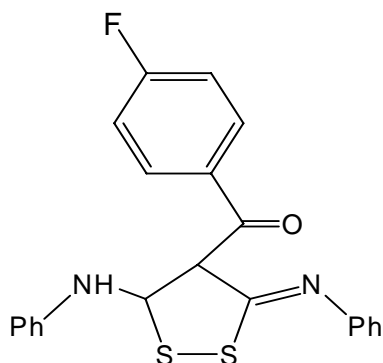

Yield: 56%. mp 144-146°C; <sup>1</sup>H NMR (400Hz, CDCl<sub>3</sub>): δ10.829(s, 1H, N-H); 8.36-6.221(m, 15H, -C=C-H). IR( $\nu_{\max}$ , cm<sup>-1</sup>): 3448(w, N-H); 1615 (s, -C=O); 1592 (s, -C=N-); 1509 (s, N-H); 1205(m, S-C). EA (Anal. Calc. (%) for C<sub>22</sub>H<sub>15</sub>FN<sub>2</sub>OS<sub>2</sub>): C 65.01 H 3.72 N 6.90 S 15.74; Found (%): C 65.15, H 3.70, N 6.88 S 15.72.

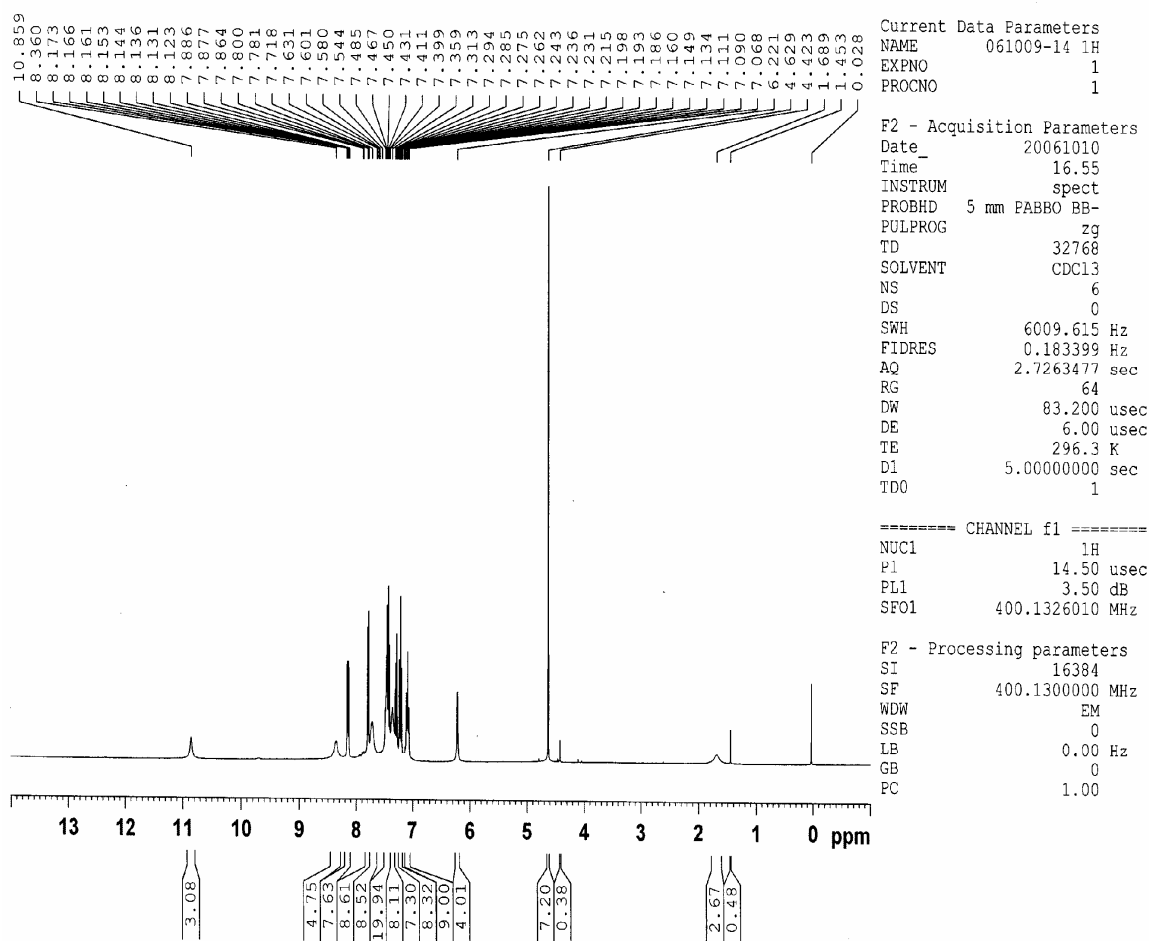

**S-12**

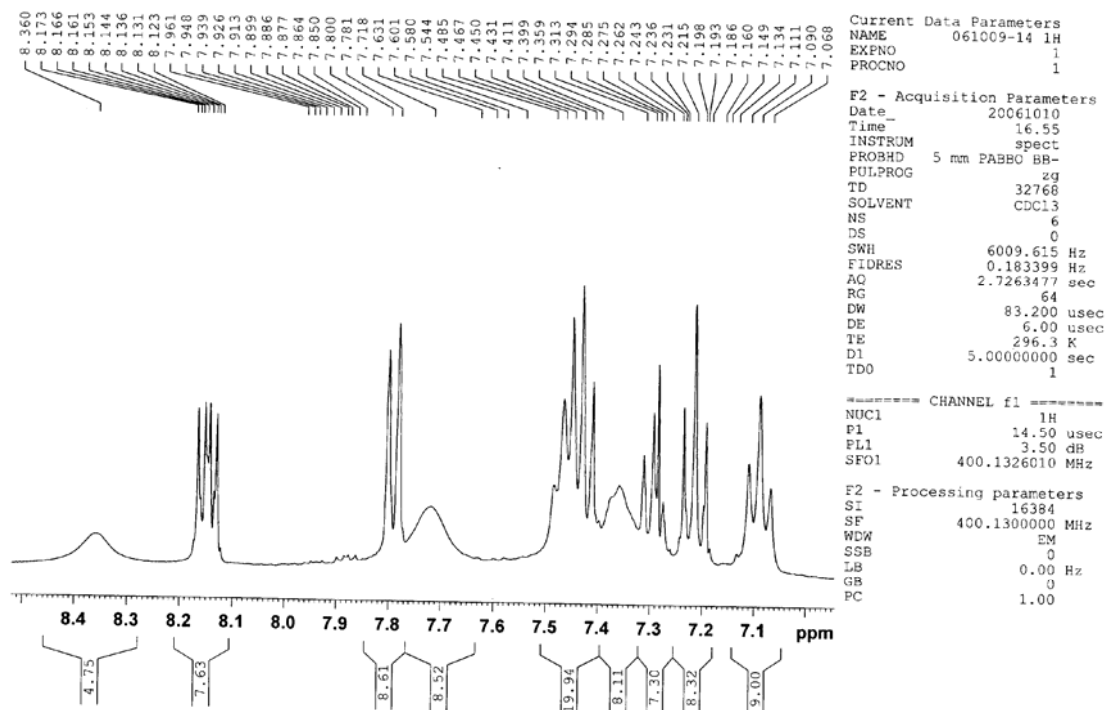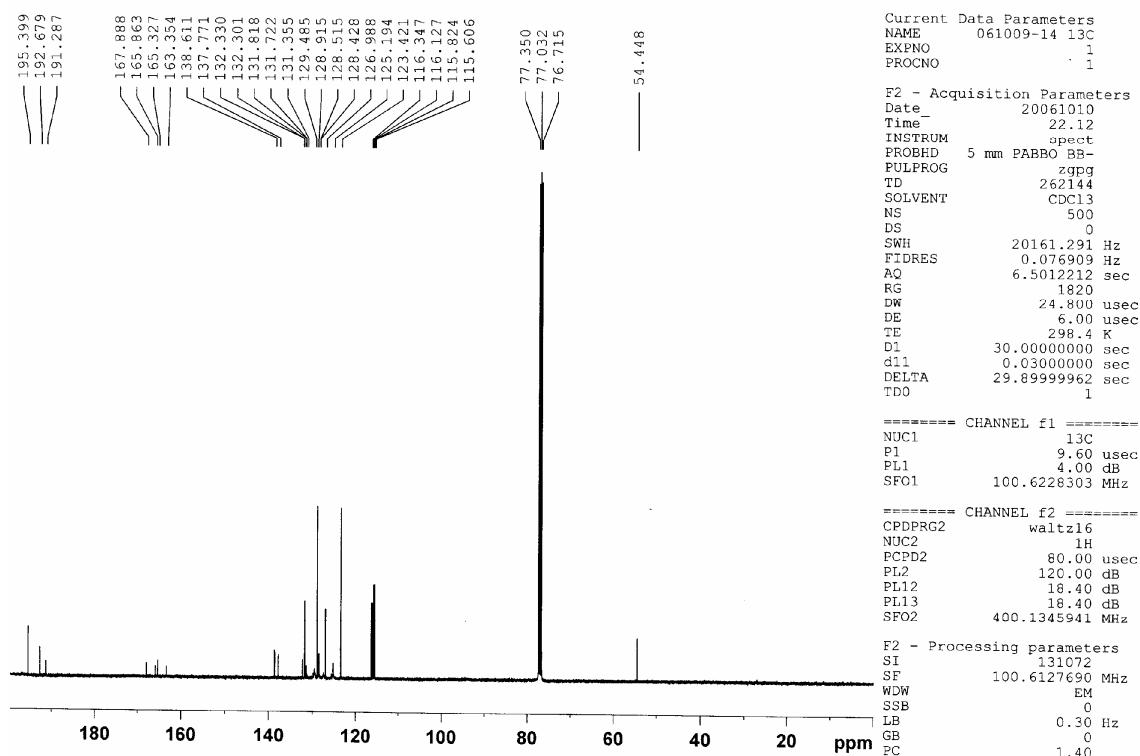

S-13

1e:

**(2,4-dichlorophenyl)((3Z)-5-(phenylamino)-3-(phenylimino)-3H-1,2-dithiol-4-yl)met  
hanone**

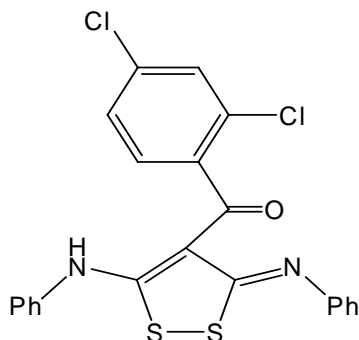

Yield: 73.5%. mp 164-166°C; <sup>1</sup>H NMR (400Hz, CDCl<sub>3</sub>): δ12.773(s, 1H N-H); 8.487-6.840(m, 14H -C=C-H).IR(*v*<sub>max</sub>, cm<sup>-1</sup>): 3430(w, N-H); 1606(s, -C=O); 1585(S, -C=N-); 1533(s, N-H); 1192(m, S-C). EA (Anal. Calc. (%) for C<sub>22</sub>H<sub>14</sub>Cl<sub>2</sub>N<sub>2</sub>OS<sub>2</sub>):C 57.90 H 3.09 N 6.12 S 13.99; Found (%):C 57.80, H 3.00,N 6.14 S 13.89.

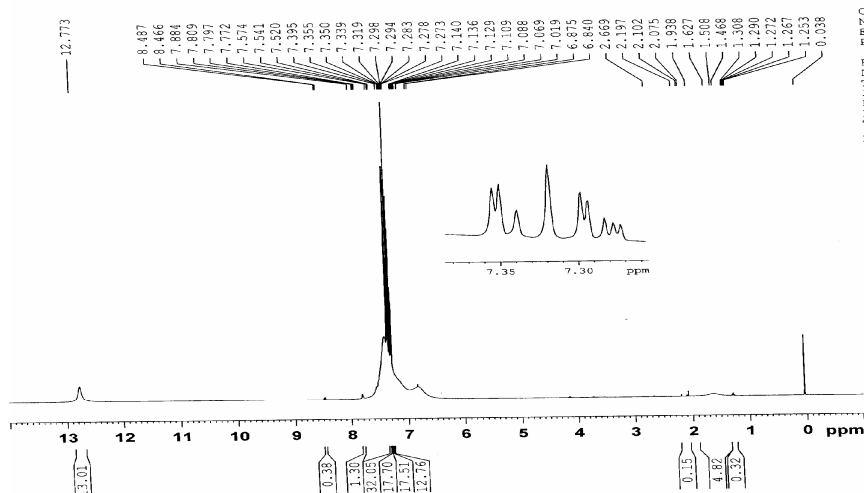

```
Current Data Parameters
NAME      061009-11 1h
EXPNO    1
PROCNO   1

F2 - Acquisition Parameters
Date_    20061010
Time     11.58
INSTRUM  spect
PROBHD   5 mm PABBO BB-
PULPROG  zgpg
TD        32768
SOLVENT  CDCl3
NS        6
DS        0
SWH       6009.615 Hz
FIDRES    0.183399 Hz
AQ         2.7263477 sec
RG         71.8
PC         83.200 usec
DE         6.00 usec
TE        296.2 K
D1         5.00000000 sec
TDD        1

===== CHANNEL f1 =====
NUC1      1H
P1         14.50 usec
PL1        3.50 dB
SFO1      400.1326010 MHz

F2 - Processing parameters
SI         16384
WDW        400.1300000 MHz
SSB        EM
LB         0.00 Hz
GB         0
PC         1.00
```

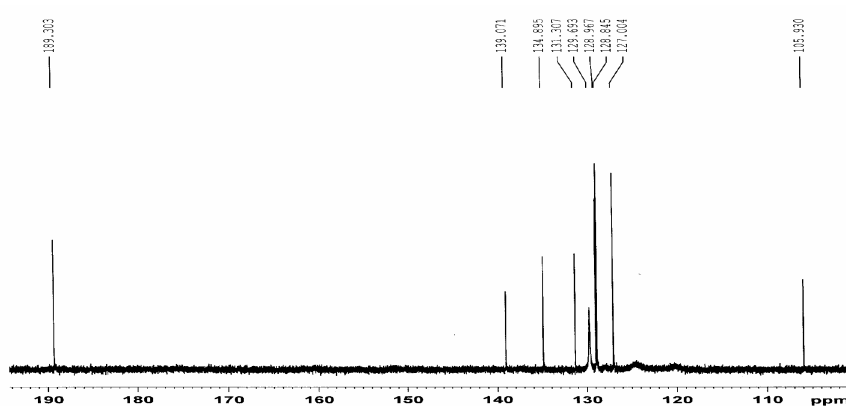

```
Current Data Parameters
NAME      061009-11 13c
EXPNO    1
PROCNO   1

F2 - Acquisition Parameters
Date_    20061010
Time     13.10
INSTRUM  spect
PROBHD   5 mm PABBO BB-
PULPROG  zgpg
TD        262144
SOLVENT  CDCl3
NS        100
DS        0
SWH       20161.291 Hz
FIDRES    0.076909 Hz
AQ         6.5032212 sec
RG         1030
PC         24.800 usec
DE         6.00 usec
TE        298.4 K
D1         30.00000000 sec
d11       0.00000000 sec
DELTA     29.899999962 sec
TDD        1

===== CHANNEL f1 =====
NUC1      13C
P1         9.00 usec
PL1        4.00 dB
SFO1      100.6228033 MHz

===== CHANNEL f2 =====
CPDPRG2  waltz16
NUC2      13C
PCPD2     80.00 usec
PL2       120.00 dB
PL12      18.40 dB
PL13      18.40 dB
SFO2      400.1345941 MHz

F2 - Processing Parameters
SI         131072
WDW        100.6127690 MHz
SSB        EM
LB         0.30 Hz
GB         0
PC         1.40
```

1f:

**(2,5-dichlorophenyl)((3Z)-5-(phenylamino)-3-(phenylimino)-3H-1,2-dithiol-4-yl)met  
hanone**

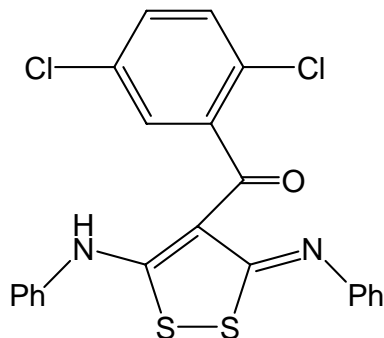

Yield: 75%. mp 173-175°C; <sup>1</sup>H NMR (400MHz, CDCl<sub>3</sub>): δ12.745(s, 1H N-H); 7.536-6.77(m, 14H -C=C-H).IR( $\nu_{\max}$ , cm<sup>-1</sup>): 3432, 3129(w, N-H); 1616(s, -C=O); 1581 (S, -C=N-); 1533(s, N-H); 1184 (m, S-C). EA (Anal. Calc. (%) for C<sub>22</sub>H<sub>14</sub>Cl<sub>2</sub>N<sub>2</sub>OS<sub>2</sub>):C 57.90 H 3.09 N 6.12 S 13.99; Found (%):C 57.80, H 3.00, N 6.15 S 13.89.

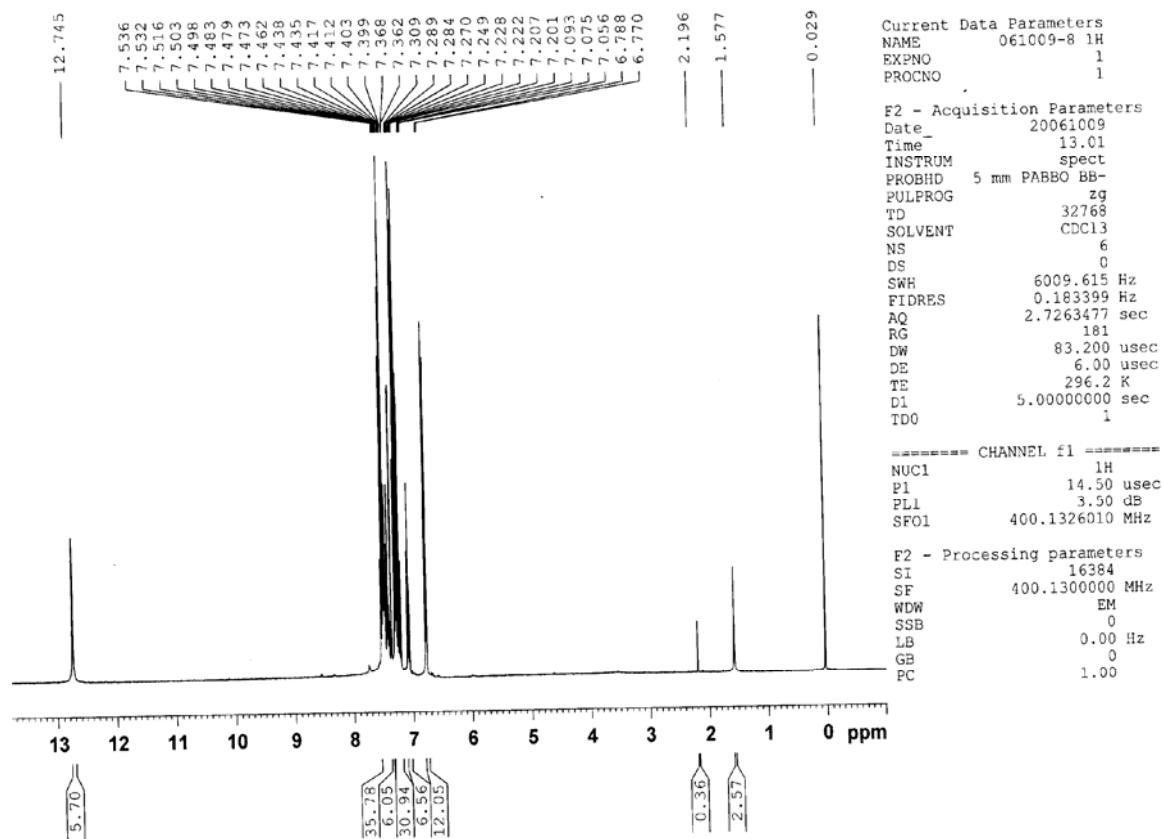

S-15



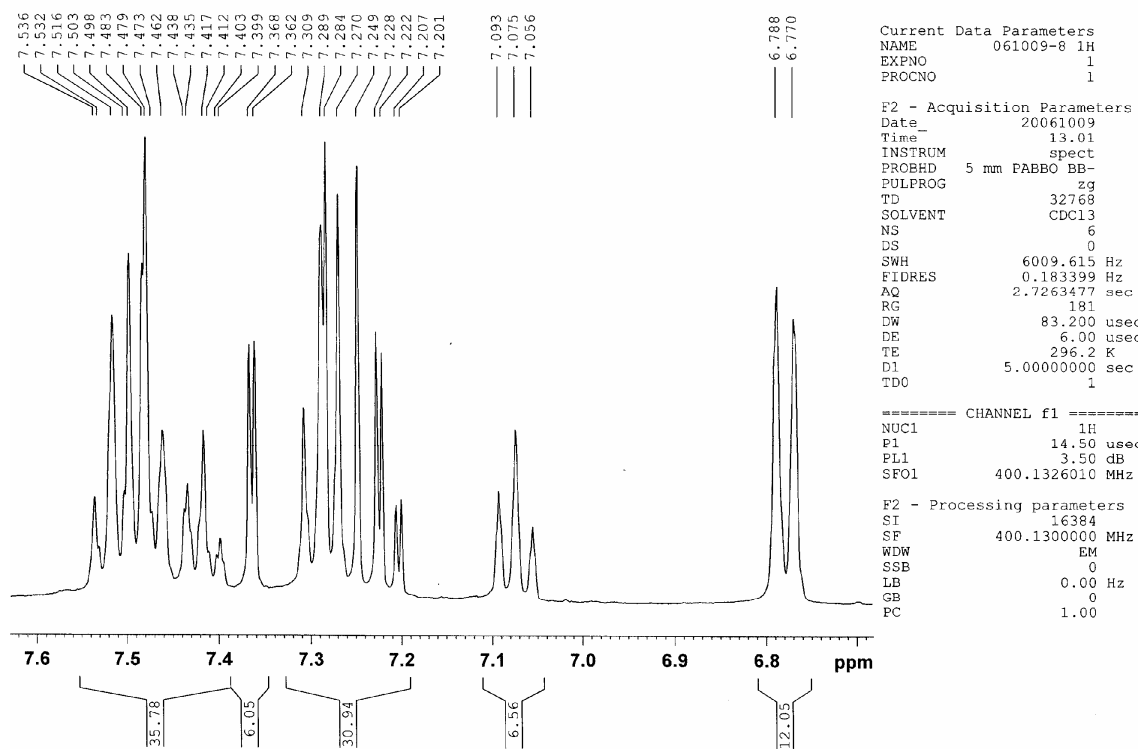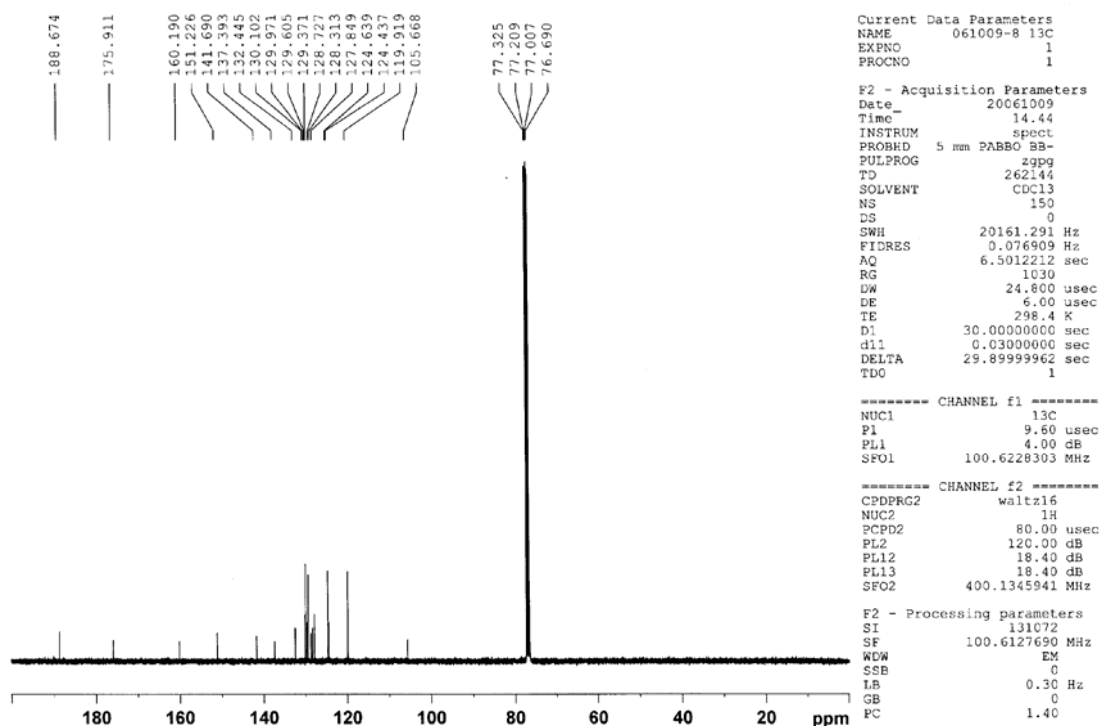

**1g:**

**(3,4-dichlorophenyl)((3Z)-5-(phenylamino)-3-(phenylimino)-3H-1,2-dithiol-4-yl)met  
hanone**

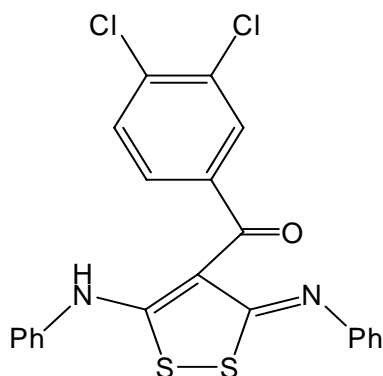

Yield: 95%. mp 170-172°C; <sup>1</sup>H NMR (400MHz, CDCl<sub>3</sub>): δ10.606(s, 1H N-H); 8.291-6.184(m, 14H -C=C-H). IR(ν<sub>max</sub>, cm<sup>-1</sup>): 3434(w, N-H); 1611 (s, -C=O); 1593 (S, -C=N-); 1521(s, N-H); 1211(m, S-C). EA (Anal. Calc. (%) for C<sub>22</sub>H<sub>14</sub>Cl<sub>2</sub>N<sub>2</sub>OS<sub>2</sub>):C 57.90H 3.09 N 6.12 S 13.99; Found (%):C 57.81, H 2.99,N 6.15 S 13.89.

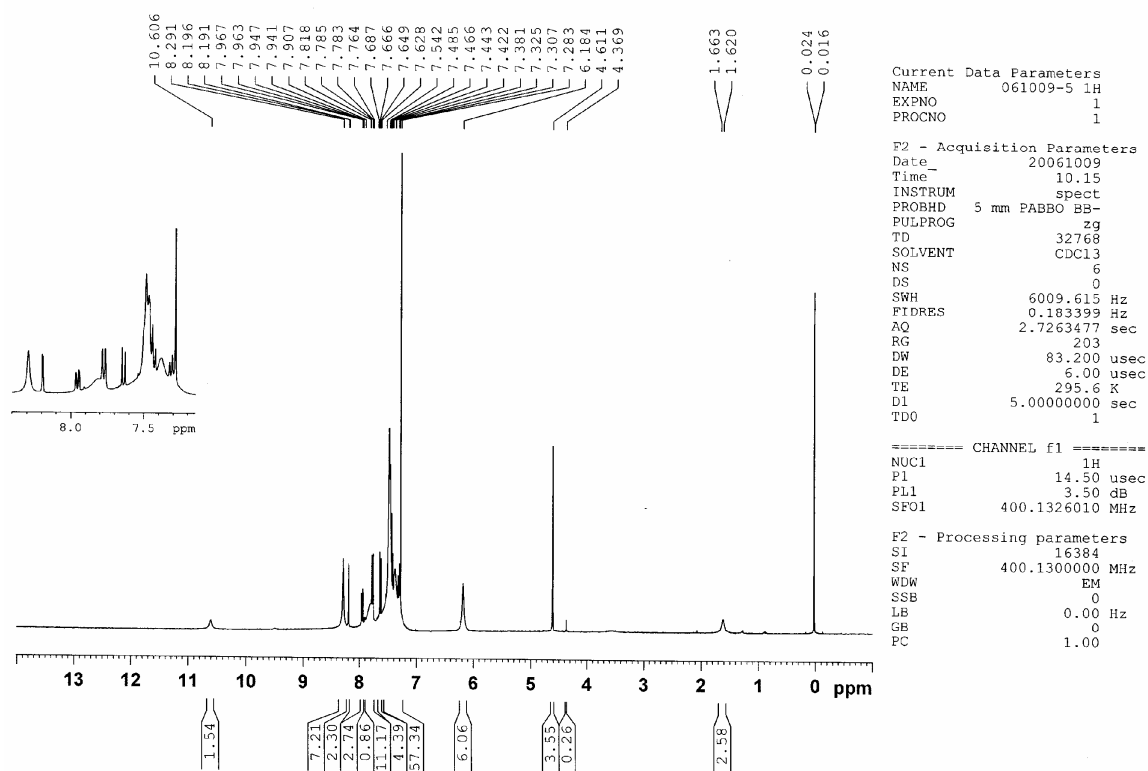

**S-17**

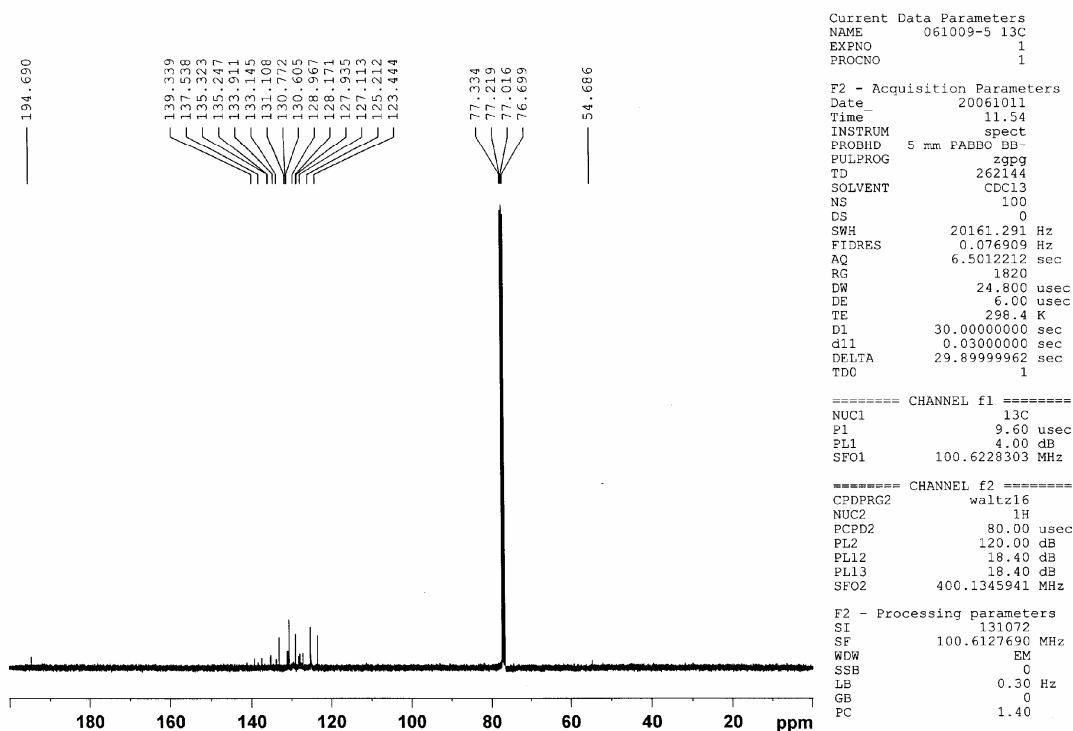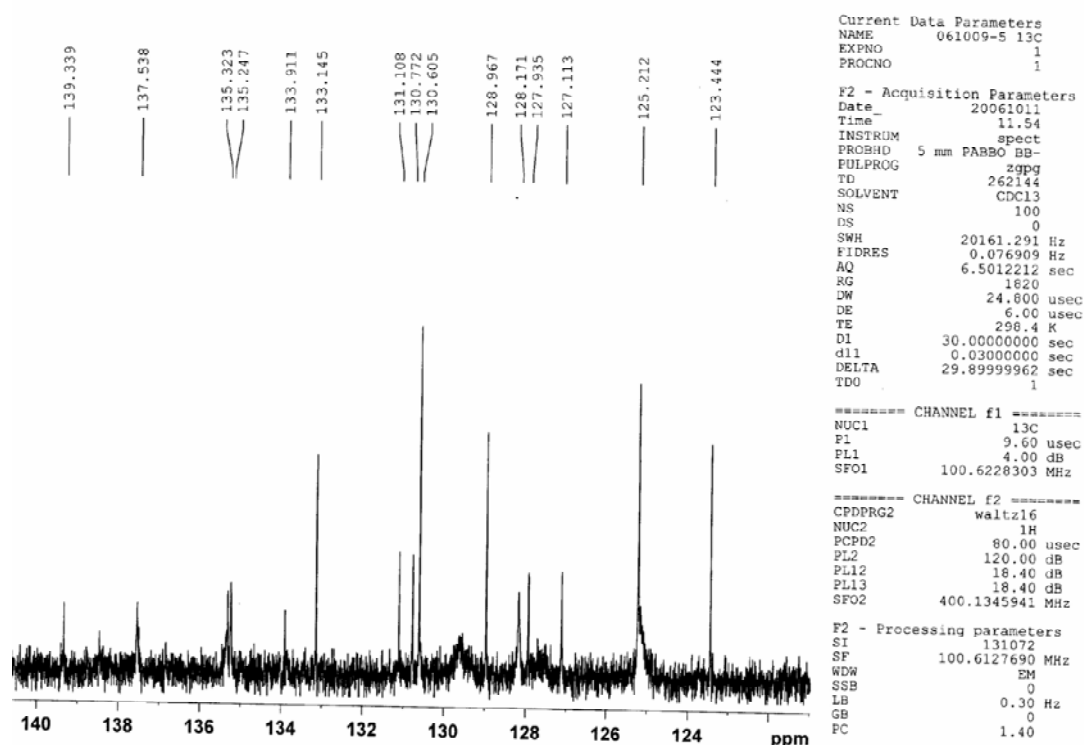

1h:

**(2,4-dichloro-5-fluorophenyl)((3Z)-5-(phenylamino)-3-(phenylimino)-3H-1,2-dithiol-4-yl)methanone**

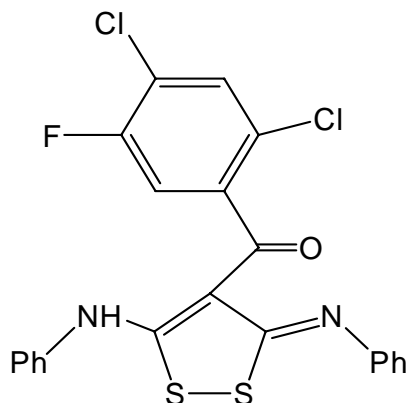

Yield: 78.5%. mp 168-170°C; <sup>1</sup>H NMR (400Hz, CDCl<sub>3</sub>): δ12.781(s, 1H N-H); 7.699-6.70(m,13H -C=C-H).IR(*v*<sub>max</sub>, cm<sup>-1</sup>): 3448(w, NH); 1625(s, -C=O); 1584(S, -C=N-); 1537(s, N-H); 1167(m, S—C). EA (Anal. Calc. (%) for C<sub>22</sub>H<sub>13</sub>Cl<sub>2</sub>FN<sub>2</sub>OS<sub>2</sub>):C 55.70H 2.76 N 5.91 S 13.46; Found (%):C 55.65, H 2.66, N 5.96 S 13.40.

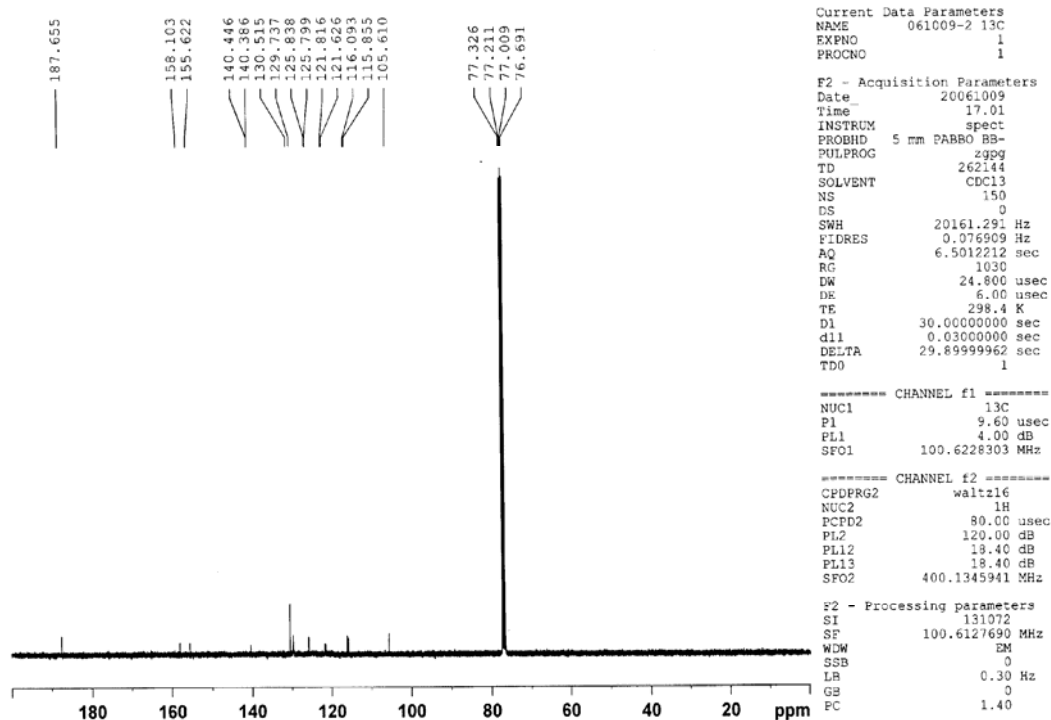

S-19

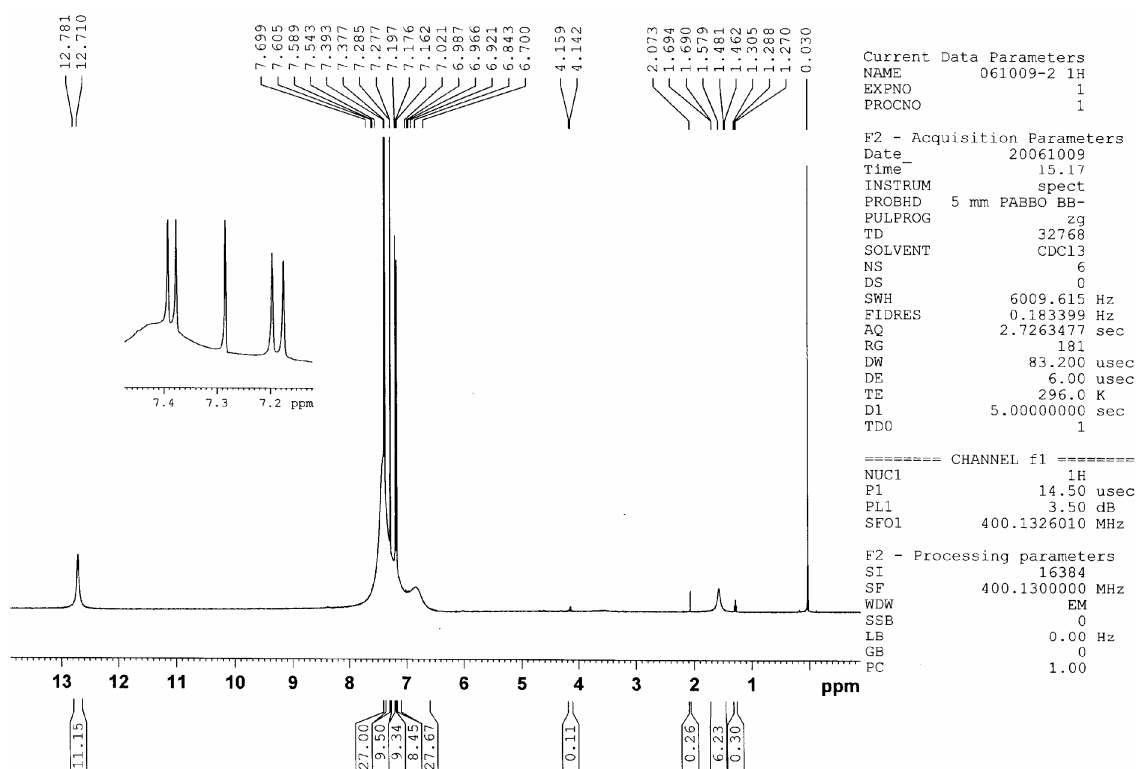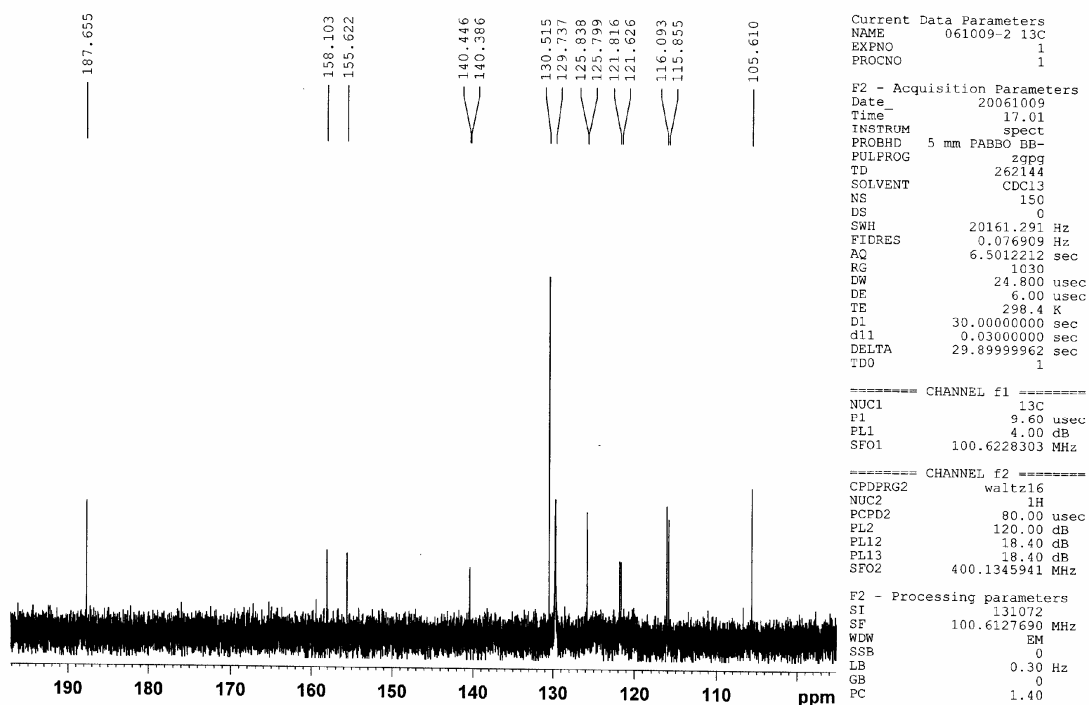

S-20

1i:

**(2-bromo-6-methylphenyl)((3Z)-5-(phenylamino)-3-(phenylimino)-3H-1,2-dithiol-4-yl)methanone**

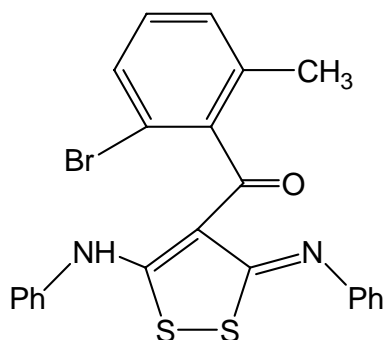

Yield: 71%. mp 172-174°C;  $^1\text{H NMR}$  (400Hz,  $\text{CDCl}_3$ ):  $\delta$ 12.770(s, 1H N-H); 8.482-6.845(m, 14H -C=C-H).IR( $\nu_{\text{max}}$ ,  $\text{cm}^{-1}$ ): 3433(w, N-H); 1609(s, -C=O); 1584 (S, -C=N-); 1545 (s, N-H); 1191(m, S-C). EA (Anal. Calc. (%) for  $\text{C}_{23}\text{H}_{17}\text{BrN}_2\text{OS}_2$ ): C 57.50H3.57 N 5.83 S 13.29; Found (%):C 57.60, H 3.55,N 5.94 S 13.20.

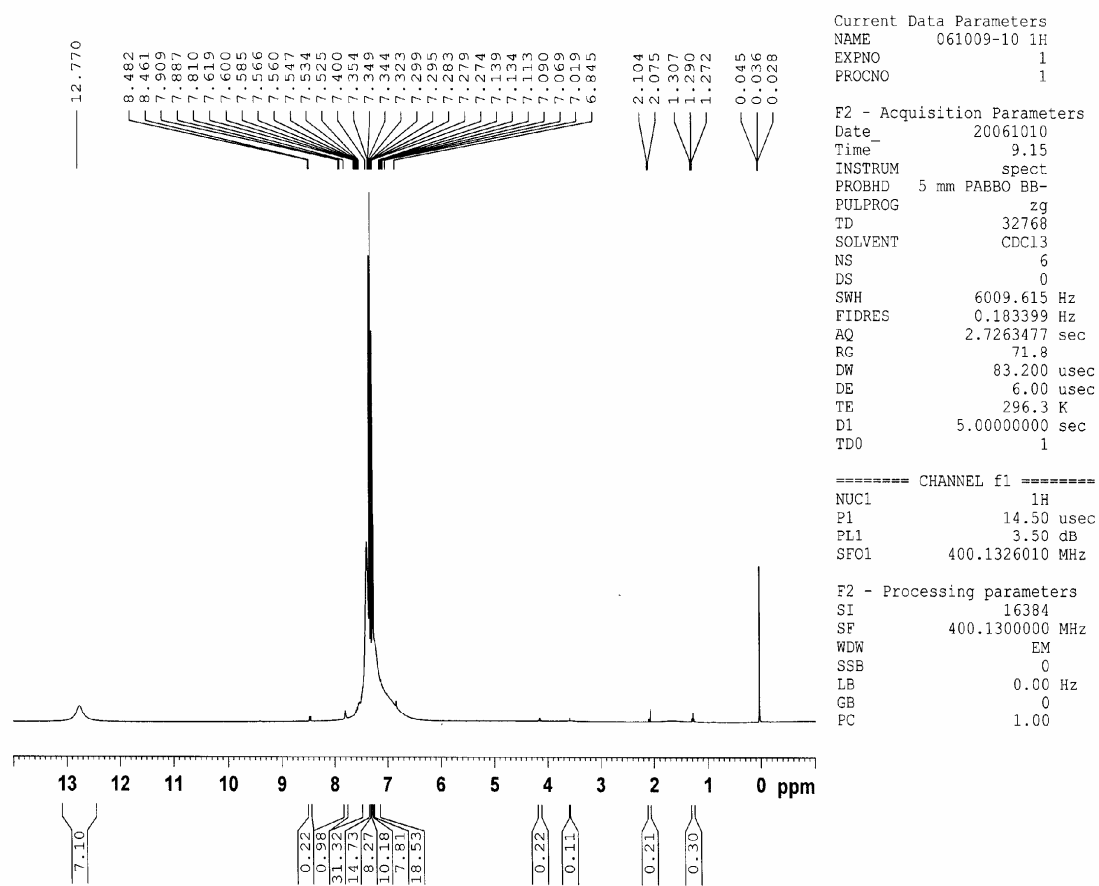

S-21

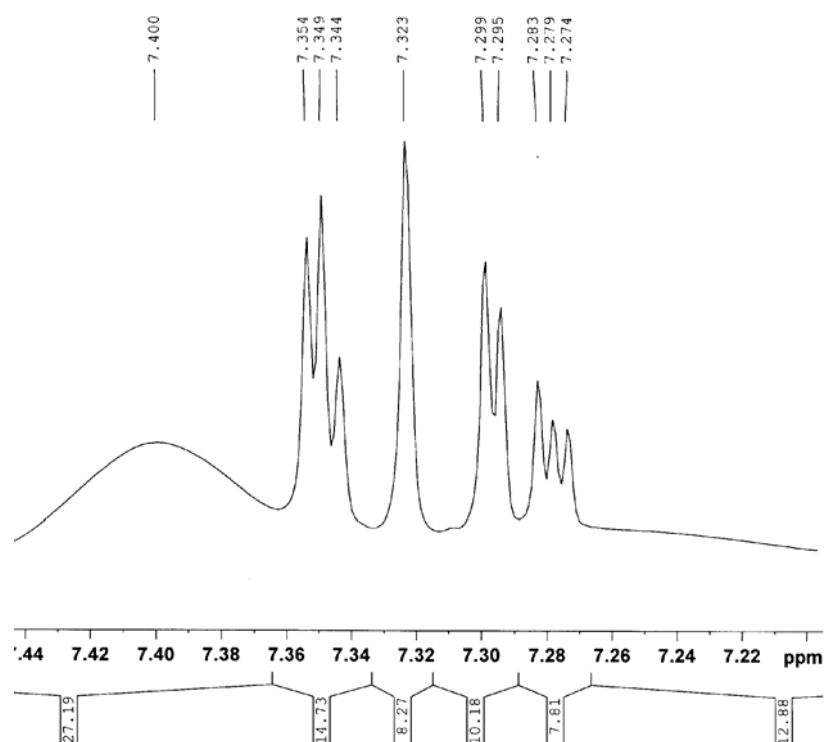

```
Current Data Parameters
NAME      061009-10 1H
EXPNO     1
PROCNO    1

F2 - Acquisition Parameters
Date_     20061010
Time_     9.15
INSTRUM   spect
PROBHD    5 mm PABBO BB-
PULPROG   zg
TD         32768
SOLVENT   CDCl3
NS         6
DS         0
SWH        6009.615 Hz
FIDRES     0.183399 Hz
AQ         2.7263477 sec
RG         71.8
DW         83.200 usec
DE         6.00 usec
TE         296.3 K
D1         5.0000000 sec
TDO       1
```

```
===== CHANNEL f1 =====
NUC1      1H
P1        14.50 usec
PL1       3.50 dB
SF01      400.1326010 MHz
```

```
F2 - Processing parameters
SI        16384
SF        400.1300000 MHz
WDW       EM
SSB       0
LB        0.00 Hz
GB        0
PC        1.00
```

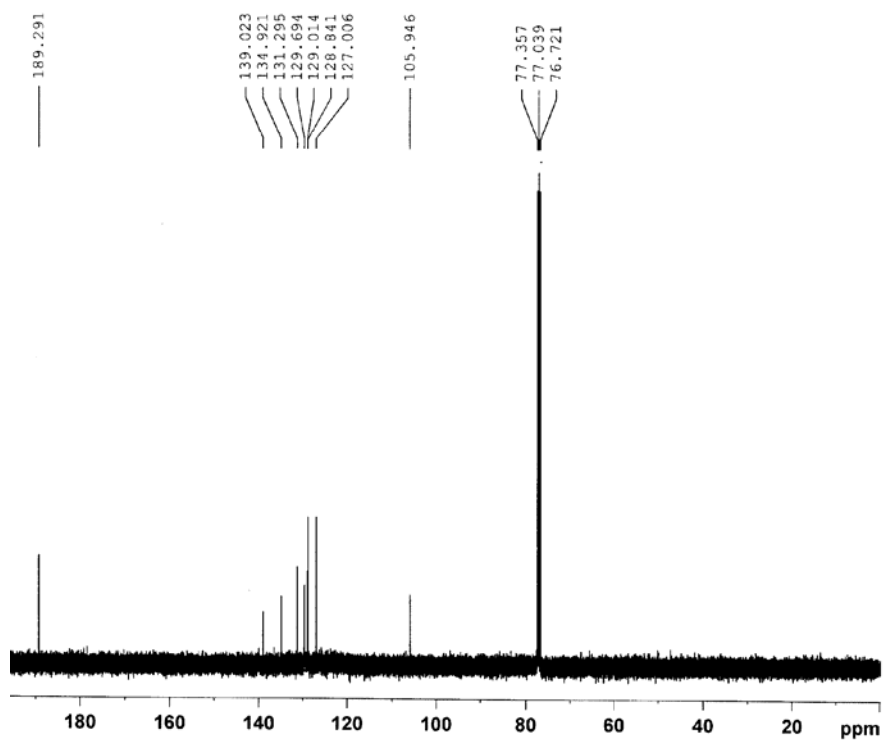

```
Current Data Parameters
NAME      061009-10 13C
EXPNO     1
PROCNO    1

F2 - Acquisition Parameters
Date_     20061010
Time_     11.39
INSTRUM   spect
PROBHD    5 mm PABBO BB-
PULPROG   zgpg
TD         262144
SOLVENT   CDCl3
NS         100
DS         0
SWH        20161.291 Hz
FIDRES     0.076909 Hz
AQ         6.5012212 sec
RG         1030
DW         24.800 usec
DE         6.00 usec
TE         298.5 K
D1         30.0000000 sec
d11        0.0300000 sec
DELTA     29.89999962 sec
TDO       1
```

```
===== CHANNEL f1 =====
NUC1      13C
P1        9.60 usec
PL1       4.00 dB
SF01      100.6228303 MHz
```

```
===== CHANNEL f2 =====
CPDPRG2   waltz16
NUC2      1H
PCPD2     80.00 usec
PL2       120.00 dB
PL12      18.40 dB
PL13      18.40 dB
SF02      400.1345941 MHz
```

```
F2 - Processing parameters
SI        131072
SF        100.6127690 MHz
WDW       no
SSB       0
LB        0.00 Hz
GB        0
PC        1.40
```

S-22

1j:

**((3Z)-5-(phenylamino)-3-(phenylimino)-3H-1,2-dithiol-4-yl)(pyridin-3-yl)methanone**

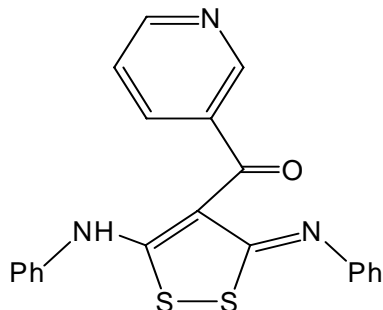

Yield: 91.5%. mp 145-147°C; <sup>1</sup>H NMR (400Hz, CDCl<sub>3</sub>): δ10.859(s, 1H, N-H); 8.360-7.068(m, 15H, -C=C-H). IR(*v*<sub>max</sub>, cm<sup>-1</sup>): 3427(w, N-H); 1618(s, -C=O); 1581 (S, -C=N-); 1496 (s, N-H); 1205(m, S-C). EA (Anal. Calc. (%) for C<sub>21</sub>H<sub>15</sub>N<sub>3</sub>OS<sub>2</sub>):C 64.77H3.89 N 10.80 S 16.43; Found (%):C 64.66, H 3.88,N 10.88 S 16.40.

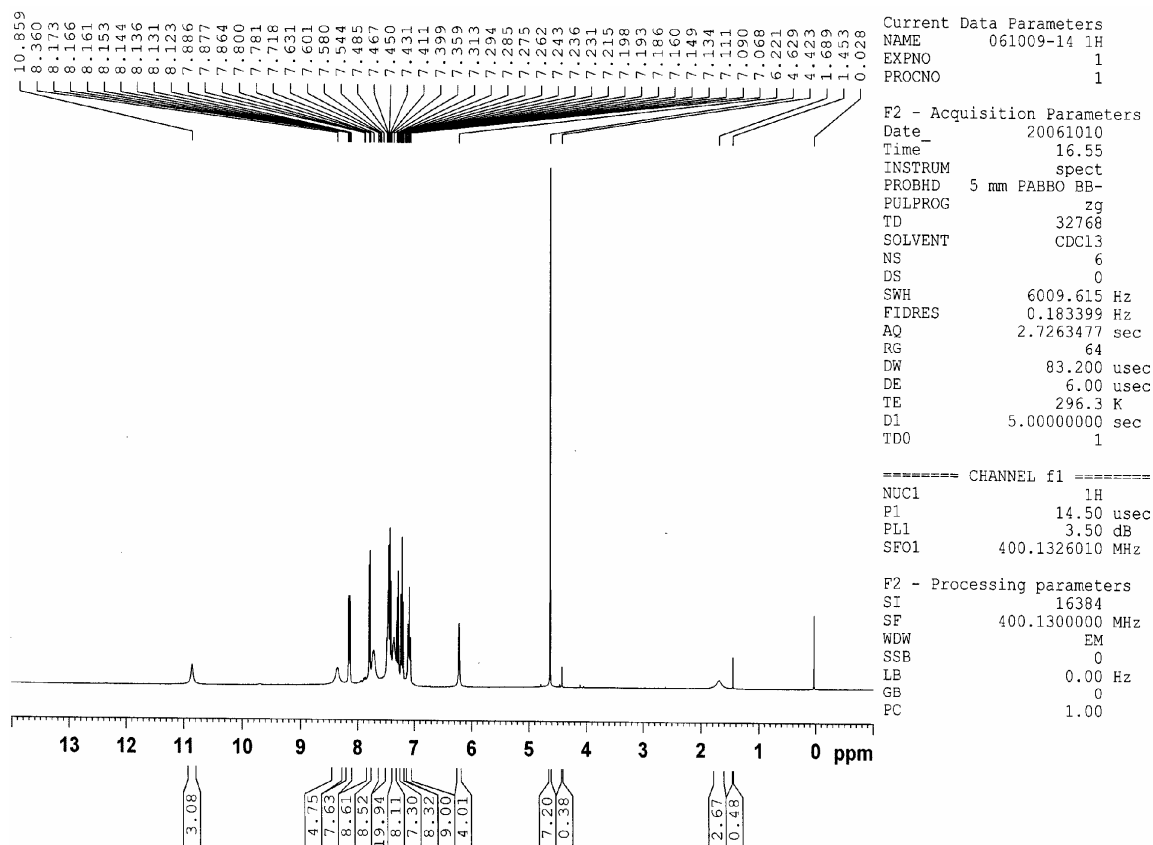

S-23



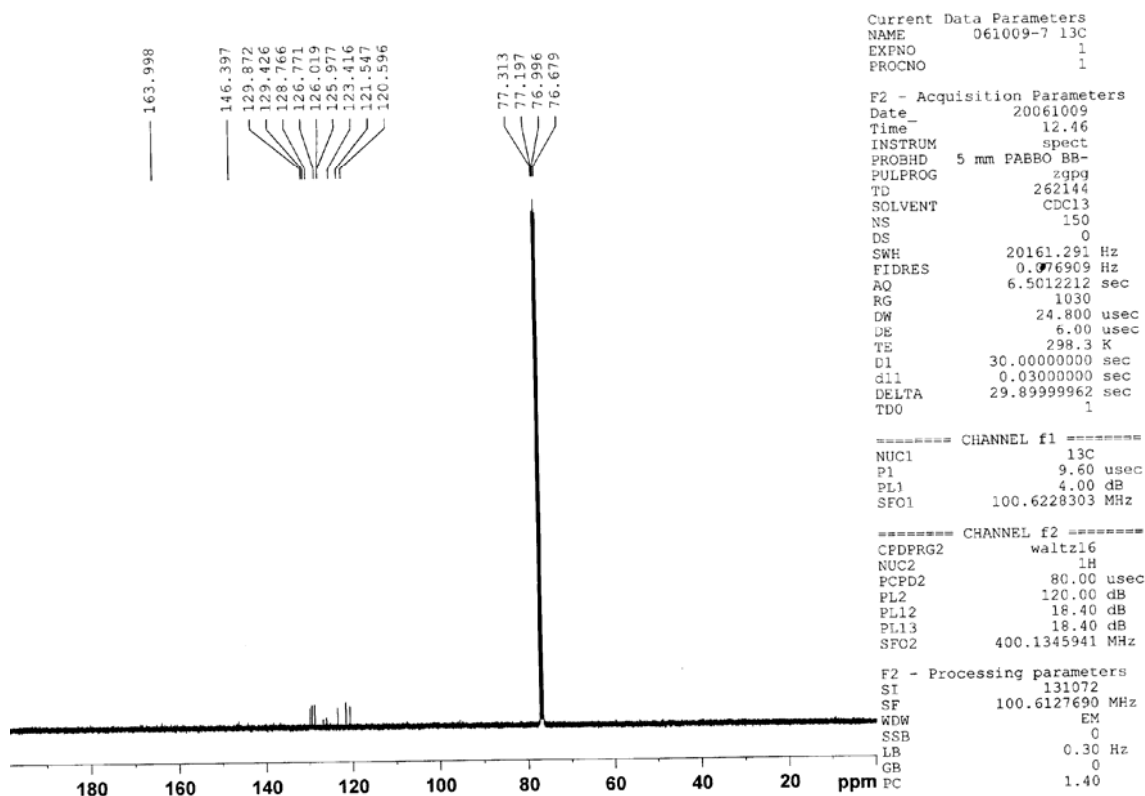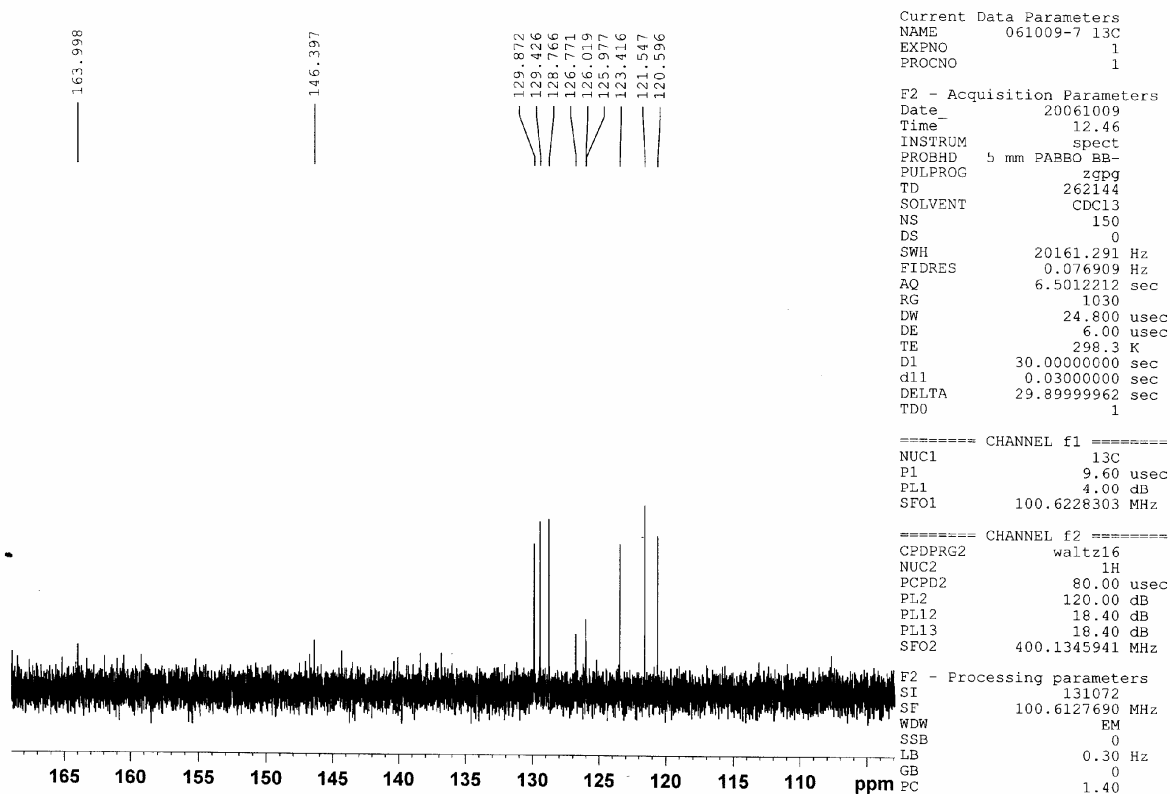

## 5-2. Spectra data for 3H-[1,2]dithiolo[3,4-b]quinolin-4(9H)-one (2)

### 2a: (3Z)-9-phenyl-3-(phenylimino)-3H-[1,2]dithiolo[3,4-b]quinolin-4(9H)-one

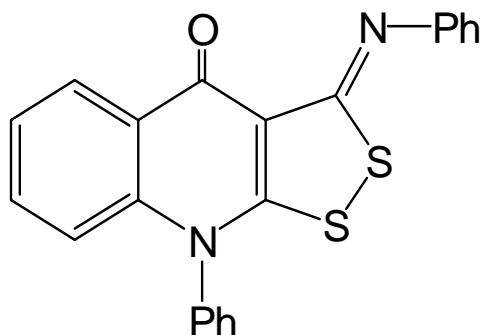

Yield: 50%. mp 253-255C; <sup>1</sup>H NMR (400Hz, CDCl<sub>3</sub>):  
δ8.35-6.99 (m, 14H -C=C-H).IR( $\nu_{\max}$ , cm<sup>-1</sup>): 3437(w,  
N-H); 1643(s, -C=O); 1576 (s, -C=N-); 1193 (m, S-C).  
EA (Anal. Calc. (%) for C<sub>22</sub>H<sub>14</sub>N<sub>2</sub>OS<sub>2</sub>):C 68.37H 3.65 N  
7.25 S 16.55; Found (%):C 68.31, H 3.70,N 7.30 S 16.50.

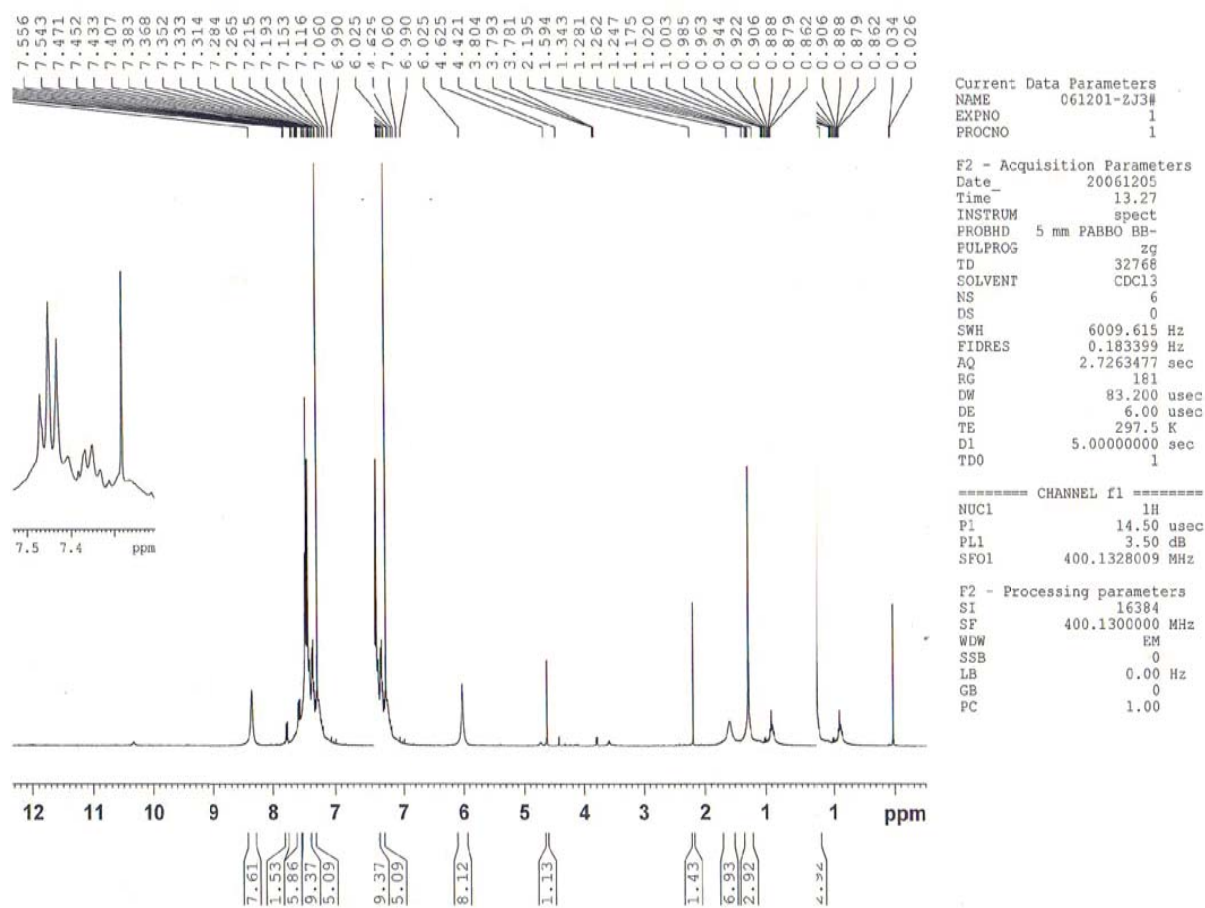

2e:

**(3Z)-7-chloro-9-phenyl-3-(phenylimino)-3H-[1,2]dithiolo[3,4-b]quinolin-4(9H)-one**

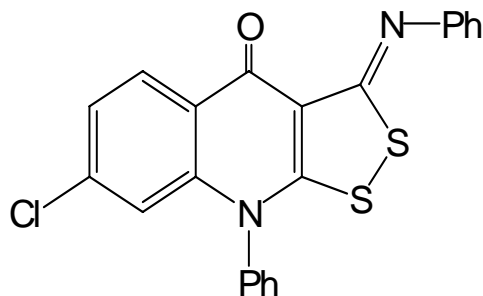

Yield: 63%. mp 274-276°C;  $^1\text{H NMR}$  (400Hz,  $\text{CDCl}_3$ ): 8.77-7.02 (m, 13H-C=C-H). IR( $\nu_{\text{max}}$ ,  $\text{cm}^{-1}$ ): 3435 (w, N-H); 1644 (s, -C=O); 1587 (s, -C=N-); 1194 (m, S-C). EA (Anal. Calc. (%) for  $\text{C}_{22}\text{H}_{13}\text{ClN}_2\text{OS}_2$ ): C 62.78 H 6.66 N 7.25 S 15.20; Found (%): C 62.75, H 3.10, N 6.68 S 15.23.

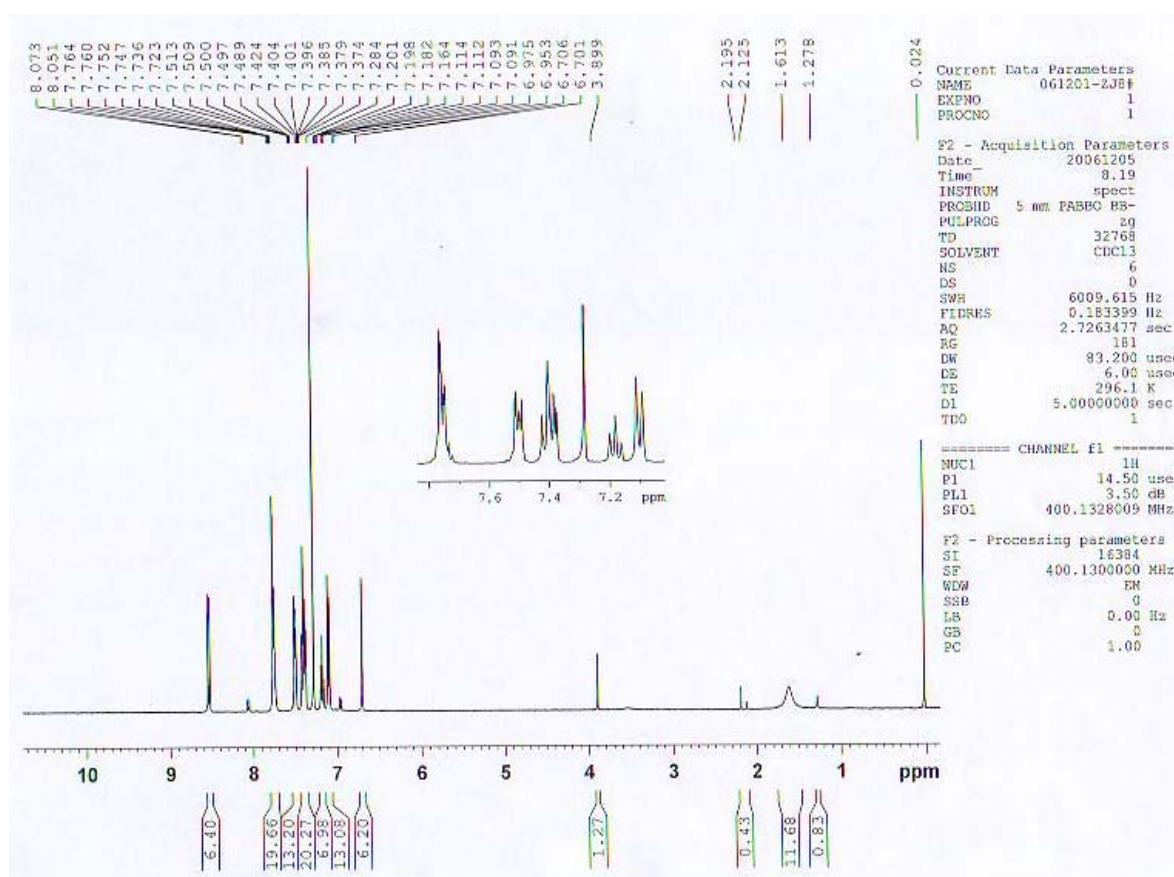

S-26

**2f:**

**(3Z)-6-chloro-9-phenyl-3-(phenylimino)-3H-[1,2]dithiolo[3,4-b]quinolin-4(9H)-one**

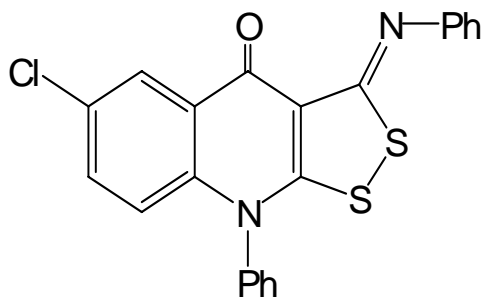

Yield: 60%. mp 270-272°C; <sup>1</sup>H NMR (400Hz, CDCl<sub>3</sub>): δ9.12-7.19 (m, 13H -C=C-H). IR(ν<sub>max</sub>, cm<sup>-1</sup>): 3417 (w, N-H); 1643 (s, -C=O); 1595 (s, -C=N-); 1214 (m, S-C). EA (Anal. Calc. (%) for C<sub>22</sub>H<sub>13</sub>ClN<sub>2</sub>OS<sub>2</sub>): C 62.78 H 6.66 N 7.25 S 15.20; Found (%): C 62.67, H 3.10, N 6.68 S 15.25.

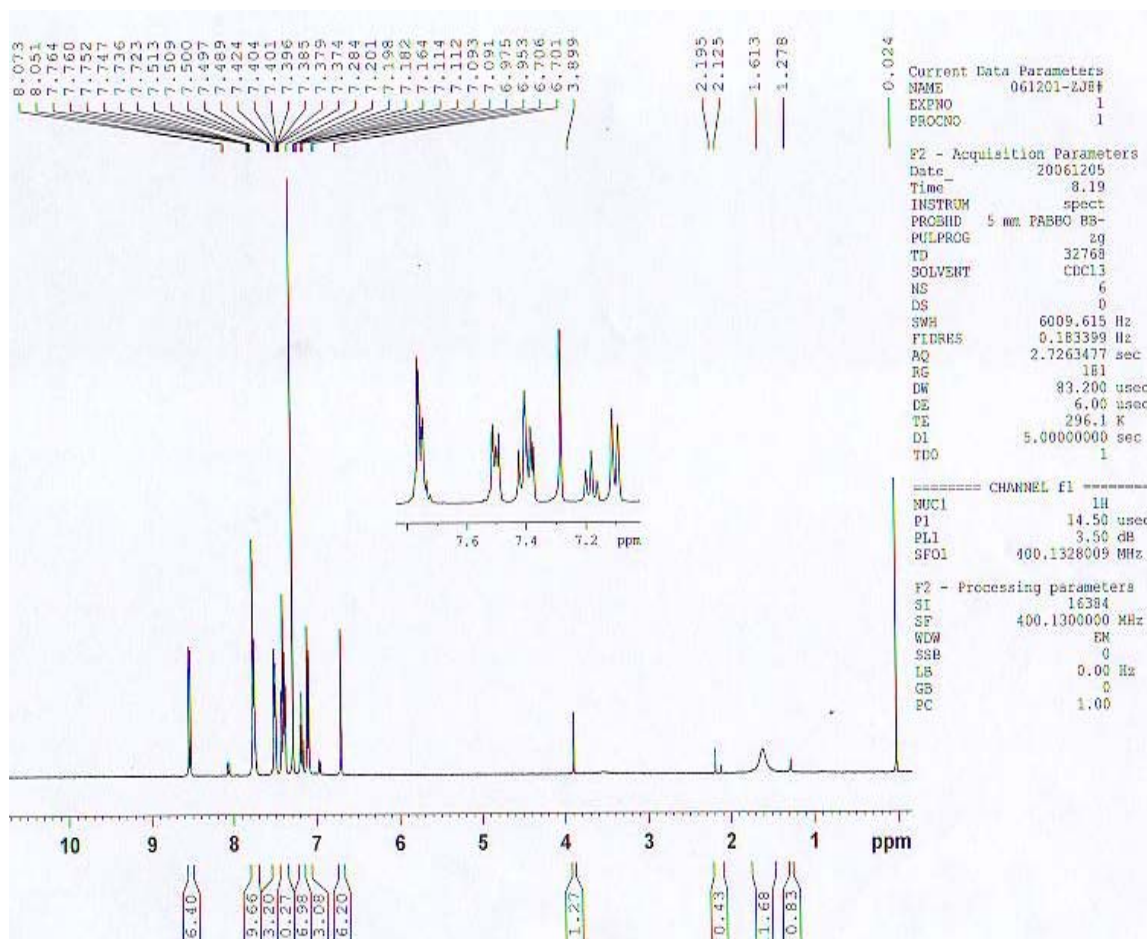

S-27

**2h:**

**(3Z)-7-chloro-6-fluoro-9-phenyl-3-(phenylimino)-3H-[1,2]dithiolo[3,4-b]quinolin-4(9H)-one**

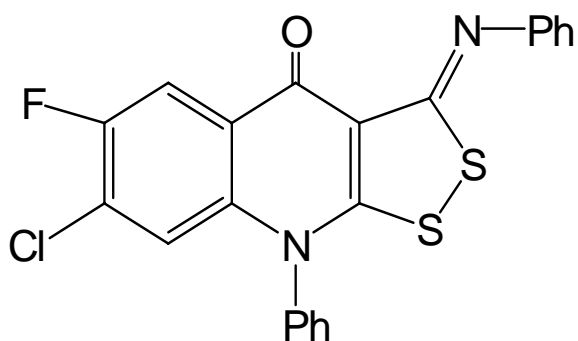

Yield: 70.5%. mp 288-290°C; IR( $\nu_{\max}$ ,  $\text{cm}^{-1}$ ): 3424 (w, N-H); 1634 (s, -C=O); 1579 (s, -C=N-); 1214 (m, S-C). EA (Anal. Calc. (%) for  $\text{C}_{22}\text{FH}_{12}\text{ClN}_2\text{OS}_2$ ): C 62.78 H 6.66 N 7.25 S 15.20; Found (%): C 62.67, H 3.10, N 6.68 S 15.25.

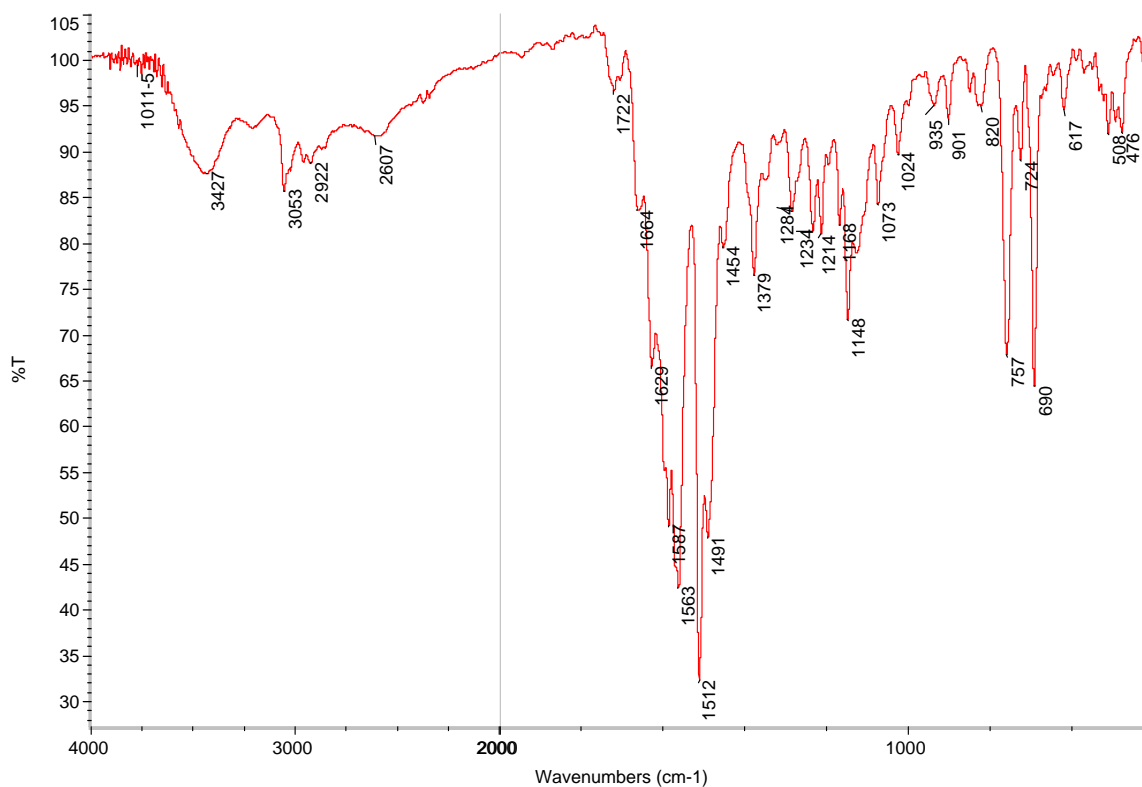

**S-28**

2i:

**(3Z)-5-methyl-9-phenyl-3-(phenylimino)-3H-[1,2]dithiolo[3,4-b]quinolin-4(9H)-one**

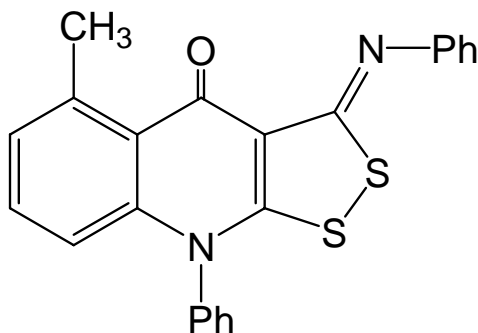

Yield: 85.5%. mp 260-262°C; <sup>1</sup>H NMR (400Hz, CDCl<sub>3</sub>): δ8.601-6.721 (m, 13H -C=C-H); IR(ν<sub>max</sub>, cm<sup>-1</sup>): 3427(w, N-H); 1629 (s, -C=O); 1587 (s, -C=N-); 1214 (m, S-C). EA (Anal. Calc. (%) for C<sub>23</sub>H<sub>16</sub>N<sub>2</sub>OS<sub>2</sub>):C 68.97 H 4.03 N 6.99 S 15.97; Found (%):C 68.80, H 3.99,N 7.02 S 15.96.

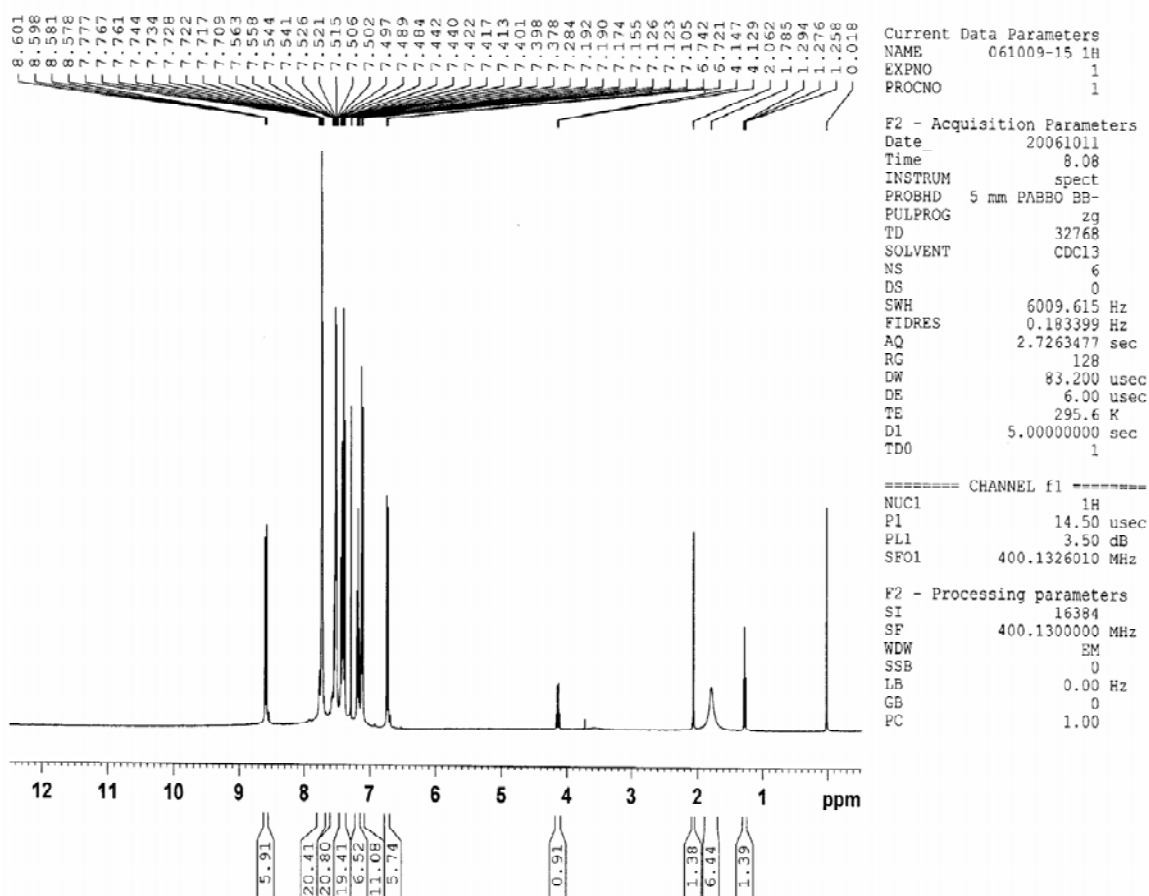

S-29

## 6. Crystallographic data for the compounds 1e

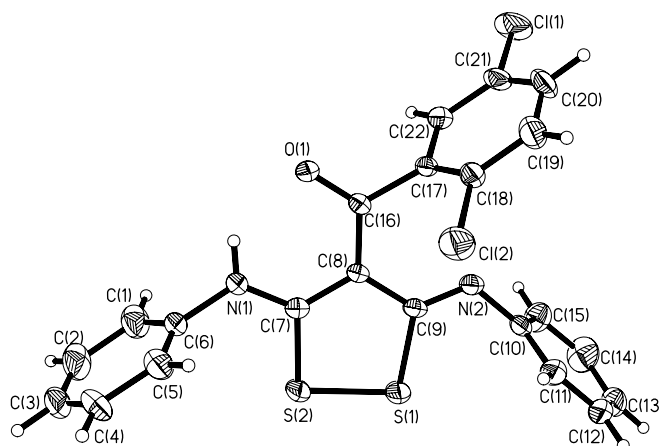

**Table S8.** Crystal data and structure refinement for **1e**.

|                                   |                                                                                                                      |
|-----------------------------------|----------------------------------------------------------------------------------------------------------------------|
| Empirical formula                 | C <sub>22</sub> H <sub>14</sub> Cl <sub>2</sub> N <sub>2</sub> O S <sub>2</sub>                                      |
| Formula weight                    | 457.37                                                                                                               |
| Temperature                       | 293(2) K                                                                                                             |
| Wavelength                        | 0.71073 Å                                                                                                            |
| Unit cell dimensions              | a = 10.084(2) Å    α = 87.60(3) deg.<br>b = 10.331(2) Å    β = 85.58(3) deg.<br>c = 10.414(2) Å    γ = 78.10(3) deg. |
| Volume                            | 1058.1(4) Å <sup>3</sup>                                                                                             |
| Z, Calculated density             | 2, 1.436 Mg/m <sup>3</sup>                                                                                           |
| Absorption coefficient            | 0.520 mm <sup>-1</sup>                                                                                               |
| F(000)                            | 468                                                                                                                  |
| Theta range for data collection   | 1.96 to 26.97 deg.                                                                                                   |
| Limiting indices                  | 0 ≤ h ≤ 12, -12 ≤ k ≤ 13,<br>-13 ≤ l ≤ 13                                                                            |
| Reflections collected / unique    | 4872 / 4604 [R(int) = 0.0464]                                                                                        |
| Completeness to theta = 26.97     | 100.0 %                                                                                                              |
| Refinement method                 | Full-matrix least-squares on F <sup>2</sup>                                                                          |
| Data / restraints / parameters    | 4604 / 0 / 263                                                                                                       |
| Goodness-of-fit on F <sup>2</sup> | 0.965                                                                                                                |
| Final R indices [I > 2σ(I)]       | R1 = 0.0668, wR2 = 0.1577                                                                                            |
| R indices (all data)              | R1 = 0.1616, wR2 = 0.2053                                                                                            |
| Extinction coefficient            | 0.007(3)                                                                                                             |
| Largest diff. peak and hole       | 0.438 and -0.490 e. Å <sup>-3</sup>                                                                                  |

**Table S9.** Bond lengths [Å] and angles [deg] for **1e**.

|            |          |                 |          |
|------------|----------|-----------------|----------|
| S(1)-C(9)  | 1.804(4) | C(9)-S(1)-S(2)  | 96.46(2) |
| S(1)-S(2)  | 2.070(2) | C(7)-S(2)-S(1)  | 95.11(2) |
| S(2)-C(7)  | 1.747(4) | C(7)-N(1)-C(6)  | 124.0(4) |
| O(1)-C(16) | 1.233(5) | C(9)-N(2)-C(10) | 119.8(4) |
| N(1)-C(7)  | 1.323(5) | N(1)-C(7)-C(8)  | 126.3(4) |
| N(1)-C(6)  | 1.437(5) | N(1)-C(7)-S(2)  | 115.7(3) |
| N(2)-C(9)  | 1.270(5) | C(8)-C(7)-S(2)  | 118.0(3) |
| N(2)-C(10) | 1.418(5) | C(7)-C(8)-C(9)  | 117.2(4) |
| C(7)-C(8)  | 1.399(6) | N(2)-C(9)-C(8)  | 127.0(4) |
| C(8)-C(9)  | 1.446(5) | N(2)-C(9)-S(1)  | 120.0(3) |
|            |          | C(8)-C(9)-S(1)  | 113.0(3) |

**7.**

**Crystallographic data for the compounds 1h**

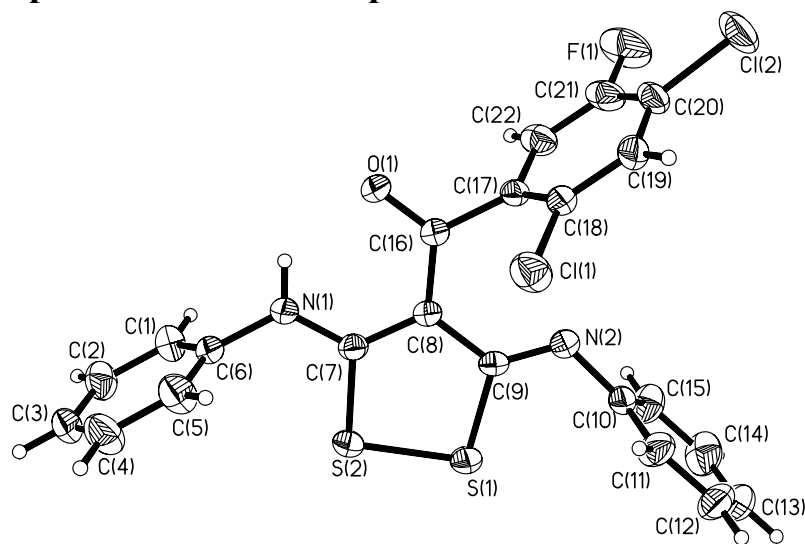

**S-31**



**Table S10.** Crystal data and structure refinement for **1h**.

|                                   |                                                                                                                                |
|-----------------------------------|--------------------------------------------------------------------------------------------------------------------------------|
| Empirical formula                 | C <sub>22</sub> H <sub>13</sub> Cl <sub>2</sub> F N <sub>2</sub> O S <sub>2</sub>                                              |
| Formula weight                    | 475.36                                                                                                                         |
| Temperature                       | 293(2) K                                                                                                                       |
| Wavelength                        | 0.71073 Å                                                                                                                      |
| Unit cell dimensions              | a = 9.896(2) Å    alpha = 89.64(3) deg.<br>b = 10.256(2) Å    beta = 73.71(3) deg.<br>c = 11.128(2) Å    gamma = 82.42(3) deg. |
| Volume                            | 1074.0(4) Å <sup>3</sup>                                                                                                       |
| Z, Calculated density             | 2, 1.470 Mg/m <sup>3</sup>                                                                                                     |
| Absorption coefficient            | 0.522 mm <sup>-1</sup>                                                                                                         |
| F(000)                            | 484                                                                                                                            |
| Theta range for data collection   | 1.91 to 26.97 deg.                                                                                                             |
| Limiting indices                  | 0<=h<=11, -12<=k<=12, -13<=l<=13                                                                                               |
| Reflections collected / unique    | 4867 / 4592 [R(int) = 0.0286]                                                                                                  |
| Completeness to theta = 26.97     | 98.4 %                                                                                                                         |
| Refinement method                 | Full-matrix least-squares on F <sup>2</sup>                                                                                    |
| Data / restraints / parameters    | 4592 / 0 / 271                                                                                                                 |
| Goodness-of-fit on F <sup>2</sup> | 1.034                                                                                                                          |
| Final R indices [I>2sigma(I)]     | R1 = 0.0482, wR2 = 0.1297                                                                                                      |
| R indices (all data)              | R1 = 0.0736, wR2 = 0.1461                                                                                                      |
| Largest diff. peak and hole       | 0.505 and -0.325 e. Å <sup>-3</sup>                                                                                            |

**Table S11.** Bond lengths [Å] and angles [deg] for **1h**.

|            |          |                 |           |
|------------|----------|-----------------|-----------|
| S(1)-C(9)  | 1.798(2) | C(9)-S(1)-S(2)  | 96.36(8)  |
| S(1)-S(2)  | 2.074(1) | C(7)-S(2)-S(1)  | 95.43(8)  |
| S(2)-C(7)  | 1.751(2) | C(7)-N(1)-C(6)  | 123.74(2) |
| O(1)-C(16) | 1.241(3) | C(9)-N(2)-C(10) | 119.7(2)  |
| N(1)-C(7)  | 1.336(3) | N(1)-C(7)-C(8)  | 126.0(2)  |
| N(1)-C(6)  | 1.436(3) | N(1)-C(7)-S(2)  | 116.06(2) |
| N(2)-C(9)  | 1.269(3) | C(8)-C(7)-S(2)  | 117.92(2) |
| N(2)-C(10) | 1.427(3) | C(7)-C(8)-C(9)  | 116.9(2)  |
| C(7)-C(8)  | 1.401(3) | N(2)-C(9)-C(8)  | 126.4(2)  |
| C(8)-C(9)  | 1.463(3) | N(2)-C(9)-S(1)  | 120.31(2) |
|            |          | C(8)-C(9)-S(1)  | 113.35(2) |

## 8. Crystallographic data for the compounds 1i

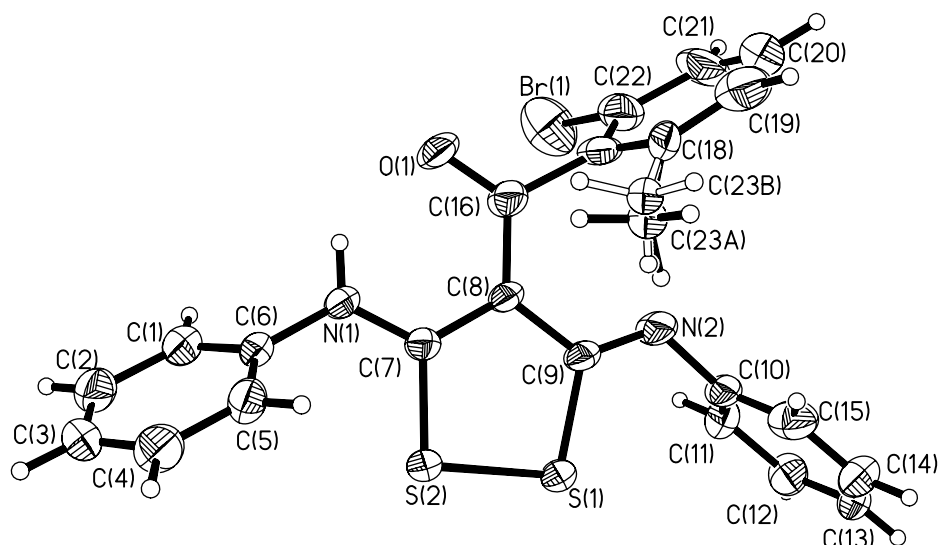

**Table S12.** Crystal data and structure refinement for **1i**.

|                                   |                                                                                                                                   |
|-----------------------------------|-----------------------------------------------------------------------------------------------------------------------------------|
| Empirical formula                 | C <sub>23</sub> H <sub>17</sub> Br N <sub>2</sub> O S <sub>2</sub>                                                                |
| Formula weight                    | 481.42                                                                                                                            |
| Temperature                       | 293(2) K                                                                                                                          |
| Wavelength                        | 0.71073 Å                                                                                                                         |
| Unit cell dimensions              | a = 6.3729(13) Å    alpha = 108.64(3) deg.<br>b = 12.941(3) Å    beta = 96.27(3) deg.<br>c = 13.413(3) Å    gamma = 96.96(3) deg. |
| Volume                            | 1027.5(4) Å <sup>3</sup>                                                                                                          |
| Z, Calculated density             | 1, 1.556 Mg/m <sup>3</sup>                                                                                                        |
| Absorption coefficient            | 2.221 mm <sup>-1</sup>                                                                                                            |
| F(000)                            | 488                                                                                                                               |
| Theta range for data collection   | 1.62 to 24.99 deg.                                                                                                                |
| Limiting indices                  | -7<=h<=7, -14<=k<=15, -15<=l<=7                                                                                                   |
| Reflections collected / unique    | 4243 / 3546 [R(int) = 0.0211]                                                                                                     |
| Completeness to theta = 24.99     | 97.7 %                                                                                                                            |
| Refinement method                 | Full-matrix least-squares on F <sup>2</sup>                                                                                       |
| Data / restraints / parameters    | 3546 / 2 / 261                                                                                                                    |
| Goodness-of-fit on F <sup>2</sup> | 1.035                                                                                                                             |
| Final R indices [I>2sigma(I)]     | R1 = 0.0938, wR2 = 0.2734                                                                                                         |
| R indices (all data)              | R1 = 0.1304, wR2 = 0.3077                                                                                                         |
| Largest diff. peak and hole       | 0.969 and -1.032 e. Å <sup>-3</sup>                                                                                               |

**Table S13.** Bond lengths [Å] and angles [deg] for **1i**

|            |          |                 |          |
|------------|----------|-----------------|----------|
| S(1)-C(9)  | 1.788(6) | C(9)-S(1)-S(2)  | 96.9(2)  |
| S(1)-S(2)  | 2.066(3) | C(7)-S(2)-S(1)  | 95.4(2)  |
| S(2)-C(7)  | 1.737(6) | C(7)-N(1)-C(6)  | 125.3(5) |
| O(1)-C(16) | 1.231(9) | C(9)-N(2)-C(10) | 120.1(6) |
| N(1)-C(7)  | 1.327(8) | N(1)-C(7)-C(8)  | 124.8(6) |
| N(1)-C(6)  | 1.428(9) | N(1)-C(7)-S(2)  | 116.8(5) |
| N(2)-C(9)  | 1.266(9) | C(8)-C(7)-S(2)  | 118.4(5) |
| N(2)-C(10) | 1.419(9) | C(7)-C(8)-C(9)  | 115.3(5) |
| C(7)-C(8)  | 1.429(9) | N(2)-C(9)-C(8)  | 125.4(6) |
| C(8)-C(9)  | 1.464(9) | N(2)-C(9)-S(1)  | 120.7(5) |
|            |          | C(8)-C(9)-S(1)  | 113.9(5) |

## 9. Crystallographic data for the compounds **2e**

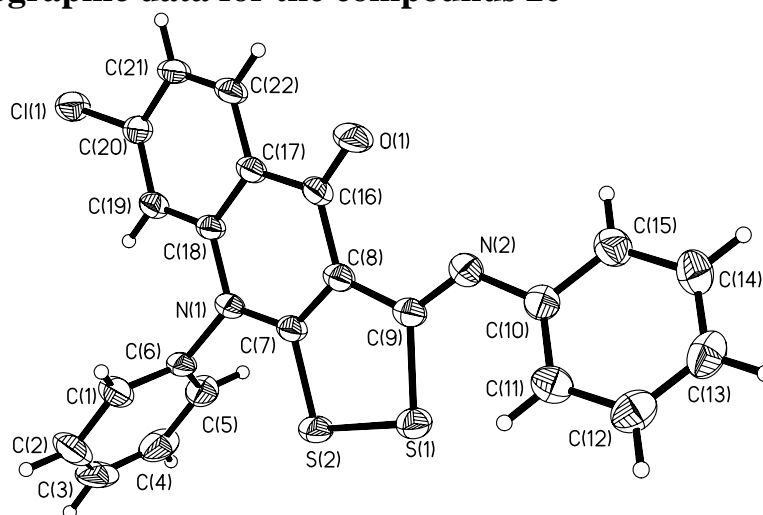

**S-34**

**Table S14.** Crystal data and structure refinement for **2e**

|                                   |                                                                                                                       |
|-----------------------------------|-----------------------------------------------------------------------------------------------------------------------|
| Empirical formula                 | C <sub>22</sub> H <sub>13</sub> ClN <sub>2</sub> O <sub>2</sub> S <sub>2</sub>                                        |
| Formula weight                    | 420.91                                                                                                                |
| Temperature                       | 293(2) K                                                                                                              |
| Wavelength                        | 0.71073 Å                                                                                                             |
| Unit cell dimensions              | a = 11.497(2) Å    alpha = 90 deg.<br>b = 7.5370(15) Å    beta = 103.64(3) deg.<br>c = 22.384(5) Å    gamma = 90 deg. |
| Volume                            | 1884.9(7) Å <sup>3</sup>                                                                                              |
| Z, Calculated density             | 4, 1.483 Mg/m <sup>3</sup>                                                                                            |
| Absorption coefficient            | 0.440 mm <sup>-1</sup>                                                                                                |
| F(000)                            | 868                                                                                                                   |
| Theta range for data collection   | 1.82 to 26.96 deg.                                                                                                    |
| Limiting indices                  | 0 ≤ h ≤ 13, 0 ≤ k ≤ 8, -26 ≤ l ≤ 26                                                                                   |
| Reflections collected / unique    | 4160 / 3966 [R(int) = 0.0332]                                                                                         |
| Completeness to theta = 26.96     | 96.4 %                                                                                                                |
| Refinement method                 | Full-matrix least-squares on F <sup>2</sup>                                                                           |
| Data / restraints / parameters    | 3966 / 0 / 253                                                                                                        |
| Goodness-of-fit on F <sup>2</sup> | 1.013                                                                                                                 |
| Final R indices [I > 2σ(I)]       | R1 = 0.0536, wR2 = 0.1404                                                                                             |
| R indices (all data)              | R1 = 0.1159, wR2 = 0.1700                                                                                             |
| Largest diff. peak and hole       | 0.603 and -0.365 e. Å <sup>-3</sup>                                                                                   |

**Table S15.** Bond lengths [Å] and angles [deg] for **2e**.

|            |           |                 |          |
|------------|-----------|-----------------|----------|
| S(1)-C(9)  | 1.815(3)  | C(9)-S(1)-S(2)  | 97.28(1) |
| S(1)-S(2)  | 2.062 (2) | C(7)-S(2)-S(1)  | 94.38(1) |
| S(2)-C(7)  | 1.745(3)  | C(7)-N(1)-C(6)  | 118.8(2) |
| O(1)-C(16) | 1.235(4)  | C(9)-N(2)-C(10) | 126.2(3) |
| N(1)-C(7)  | 1.358(4)  | N(1)-C(7)-C(8)  | 124.6(3) |
| N(1)-C(6)  | 1.456(3)  | N(1)-C(7)-S(2)  | 116.3(2) |
| N(2)-C(9)  | 1.277(4)  | C(8)-C(7)-S(2)  | 119.1(3) |
| N(2)-C(10) | 1.409(4)  | C(7)-C(8)-C(9)  | 117.5(3) |
| C(7)-C(8)  | 1.384(4)  | N(2)-C(9)-C(8)  | 124.5(3) |
| C(8)-C(9)  | 1.455(5)  | N(2)-C(9)-S(1)  | 123.8(3) |
|            |           | C(8)-C(9)-S(1)  | 111.6(2) |

**S-35**

## 10. Drug screening report

**Biology Principles.** In the mitochondria of living cells, there are NADP-related dehydrogenases, which can reduce the ectogenic MTT (methyl thiazolyl tetrazolium) to undissolvable amethyst crystal (formazan) and make it deposited in cells. Such phenomenon couldn't take place in dead cells. The MTT assay makes use of dimethyl sulfoxide (DMSO) or trigeminy reagent (10%SDS-5%isobutanol-0.01mol/L HCl) to dissolve the amethyst crystals and determine the OD value at 570nm wave by the Universal Microplate Reader ELx800 (BioTek) to reflect the amount of living cells indirectly. This assay is frequently used in the vitro research in antitumor drugs, especially as to the large-scale screening.

**Methods and Highlights.** Inoculate the tumor cells in exponential phase of growth to a 96-well plate quantitatively and add drug solution to the medium after incubating for 24 hours. Incubate 48 hours continuously at 37 °C and 5% CO<sub>2</sub>, add MTT solution and incubate for another 4 hours. Then, DMSO is added and the OD value at 570nm wave is determined by the Universal Microplate Reader ELx800 (BioTek) when the mixture is dissolved. Overnight incubation is needed before determining if the trigeminy reagent is used to dissolve precipitation.

**Table S16** The Inhibition Effects of tested drugs on Vitro growth of **HepG-2**.

| Entry     | Concentration      |                    |                    |                    | IC <sub>50</sub>          |
|-----------|--------------------|--------------------|--------------------|--------------------|---------------------------|
|           | 10 <sup>-4</sup> M | 10 <sup>-5</sup> M | 10 <sup>-6</sup> M | 10 <sup>-7</sup> M |                           |
| <b>1c</b> | 78.91%             | 62.72%             | 53.54%             | 2.22%              | 1.36 × 10 <sup>-6</sup> M |
| <b>2a</b> | 48.19%             | 10.91%             | 3.65%              | 3.33%              | 3.11 × 10 <sup>-4</sup> M |

**Table S17** The Inhibition Effects of tested drugs on Vitro growth of **SMMC-7221**.

| Entry     | Concentration      |                    |                    |                    | IC50                      |
|-----------|--------------------|--------------------|--------------------|--------------------|---------------------------|
|           | 10 <sup>-4</sup> M | 10 <sup>-5</sup> M | 10 <sup>-6</sup> M | 10 <sup>-7</sup> M |                           |
| <b>1c</b> | 58.77%             | 15.57%             | 7.69%              | 6.41%              | 1.39 × 10 <sup>-4</sup> M |
| <b>2a</b> | 11.88%             | 11.04%             | 5.30%              | 0.99%              | 7.34 × 10 <sup>-3</sup> M |

**Table S18.** The Inhibition Effects of tested drugs on Vitro growth of HepG-2 at different time

| Entry     | Time (H) | Concentration      |                    |                    |                    |
|-----------|----------|--------------------|--------------------|--------------------|--------------------|
|           |          | 10 <sup>-4</sup> M | 10 <sup>-5</sup> M | 10 <sup>-6</sup> M | 10 <sup>-7</sup> M |
| <b>1b</b> | 12h      | 41.26%             | 29.14%             | 17.38%             | 14.36%             |
|           | 24h      | 53.52%             | 35.06%             | 26.99%             | 16.46%             |
|           | 48h      | 73.02%             | 50.54%             | 29.46%             | 18.85%             |
| <b>1h</b> | 12h      | 23.60%             | 16.77%             | 11.63%             | 10.36%             |
|           | 24h      | 36.52%             | 20.67%             | 18.14%             | 13.70%             |
|           | 48h      | 63.60%             | 25.62%             | 17.41%             | 15.75%             |
| <b>1d</b> | 12h      | 71.55%             | 59.21%             | 38.78%             | 10.37%             |
|           | 24h      | 77.56%             | 66.82%             | 45.61%             | 11.02%             |
|           | 48h      | 93.69%             | 83.65%             | 59.75%             | 16.04%             |
| <b>1j</b> | 12h      | 47.75%             | 35.41%             | 15.11%             | 12.80%             |
|           | 24h      | 62.64%             | 41.33%             | 19.60%             | 10.22%             |
|           | 48h      | 70.81%             | 50.72%             | 26.20%             | 18.04%             |
| <b>2d</b> | 12h      | 29.28%             | 18.33%             | 14.82%             | 12.36%             |
|           | 24h      | 44.69%             | 24.89%             | 11.21%             | 8.24%              |
|           | 48h      | 57.75%             | 15.02%             | 12.51%             | 0.02%              |
